# Supplementary material
Source: PubMed Central journal article supplement (PMC9995219)
Supplement: NIHMS1875067-supplement-10.pdf [file NIHMS1875067-supplement-10.pdf]

## Supplementary Discussion

LD-targeted proteins can be divided into two classes. Class I (or ERTOLD) proteins feature hydrophobic hairpins that allow them to diffuse from the ER bilayer onto the LD monolayer, while class II (or CYTOLD) proteins contain amphipathic helices that facilitate their direct recruitment from the cytoplasm to the LD<sup>1,2</sup>. Our data suggest that CLSTN3 $\beta$  should be categorized as a class I protein: its N-terminal LD-targeting domain does not have clear amphipathic character and is predicted to fold into a series of three hydrophobic hairpin-like structures. Our analysis of CLSTN3 $\beta$  truncation mutants supports this model empirically, as each individual hairpin is sufficient for LD targeting on its own but targeting efficiency markedly improves when multiple hairpins are combined. Thus, with its ER-anchored TM domain and three LD-targeting hairpins, the CLSTN3 $\beta$  protein seems uniquely optimized for ER-LD contact formation. Structural analysis of CLSTN3 $\beta$  will be essential to more precisely define the conformation of this novel LD-targeting domain.

With unbiased proteomics, we identified the CIDE proteins as binding partners of CLSTN3 $\beta$  that contribute to its effects on LD size. CLSTN3 $\beta$  binds to the C-terminal region of CIDEs and impairs their ability to facilitate lipid transfer between LDs. Consistent with these findings, the effect of CLSTN3 $\beta$  overexpression on LD morphology mirrors that of CIDE depletion – both manipulations lead to small LD accumulation and increased triglyceride breakdown<sup>3-12</sup>. In particular, CLSTN3 $\beta$  overexpression mimics mutations in the C-terminal region of CIDEs that have been shown to block lipid transfer without affecting LD localization or LD-LD docking<sup>9,13</sup>. To the best of our knowledge, CLSTN3 $\beta$  is the first example of a protein that selectively inhibits CIDE function. Thus, our findings at least partially explain the distinct LD morphologies of brown/beige and white adipocytes, all of which express high levels of CIDE proteins.

Brown adipocyte LDs are presumed to be an important source of free fatty acids (FFAs) for adipose thermogenesis, at least during the acute phase of cold exposure. However, recent studies have demonstrated that brown adipocytes can shift to alternative fuel sources when intracellular lipids are not available. Multiple groups have reported that the absence of lipolytic machinery, or LDs altogether, in brown adipocytes does not result in hypothermia during acute cold exposure<sup>14-16</sup>. Interestingly, mice defective in LD utilization are able to compensate through a variety of mechanisms, including enhanced uptake of circulating FFAs, increased utilization of alternative fuel sources (e.g. glucose), and even storage of glycogen in BAT. These provocative findings highlight the extent to which loss of “normal” BAT thermogenesis can be offset by diverse compensatory mechanisms. Nevertheless, while brown adipocyte LDs may not be essential for maintaining euthermia, the fact that their absence triggers such dramatic reprogramming of BAT metabolism suggests that they do play an important role in adipose thermogenesis under physiological conditions. Accordingly, we found that AdC3KO mice acclimated normally to the cold despite having substantially larger LDs in BAT, presumably because of compensatory mechanisms such as increased carbohydrate utilization. Indeed, <sup>18</sup>F-FDG PET/CT analysis revealed that AdC3KO BAT took up substantially more glucose than WT BAT during acute cold exposure. However, if mice were acclimated to thermoneutrality prior to acute cold challenge – thereby minimizing the need for compensatory pathway engagement – CLSTN3 $\beta$  knockout mice showed a defective thermogenic response.

While this study was in progress, it was reported that CLSTN3 $\beta$  functions as a chaperone for the neurotrophic factor S100B and promotes sympathetic innervation of thermogenic adipose tissue<sup>17</sup>. Since the *Clstn3* locus also encodes a brain-specific plasma membrane protein involved in synapse organization<sup>18–22</sup>, this is an attractive model for CLSTN3 $\beta$  function – one that was also considered in this study. We were able to visualize sympathetic innervation of whole BAT lobes from WT and AdC3KO mice by modifying the published AdipoClear protocol, which has previously been used to image WAT<sup>23–25</sup>. We cannot fully exclude the possibility that our methods were insufficiently sensitive to detect an effect of CLSTN3 $\beta$  on adipose innervation, but our data did not reveal that gain or loss of CLSTN3 $\beta$  function affected sympathetic innervation or adrenergic signaling. Rather, we found that acute expression of CLSTN3 $\beta$  in BAT was still able to promote multilocularity and reduce lipid deposition in adult mice housed at thermoneutrality, where adrenergic tone is minimal. Our proposed physiologic role for CLSTN3 $\beta$  in LD dynamics is also consistent with the observation that *Clstn3b* remains highly expressed and transcriptionally regulated in adult mice even though adipose innervation is thought to be largely established during development<sup>26</sup>. Notably, CIDEA and CIDEA were previously found to be the most and seventh-most downregulated proteins in CLSTN3 $\beta$  knockout BAT, respectively<sup>17</sup>.

We did observe a reduction in S100B protein levels in CLSTN3 $\beta$  KO BAT under certain conditions (Extended Data Fig. 8I); however, our data suggest that this is a secondary effect of CLSTN3 $\beta$  deletion *in vivo*, not a direct effect of CLSTN3 $\beta$  on S100B stability or secretion (Extended Data Fig. 8J). The principal function of CLSTN3 $\beta$  seems unlikely to be to serve as an obligate chaperone for S100B because S100B is expressed in a different set of cell types than is CLSTN3 $\beta$ , and ER-localized CLSTN3 $\beta$  is targeted for ubiquitination and degradation via ERAD. Furthermore, the adipocyte-selective N-terminal component of the CLSTN3 $\beta$  protein is oriented towards the cytoplasmic face of the ER and robustly associates with LDs via a hairpin-like domain. These structural features do not seem to be optimized for a chaperone function. Importantly, our studies do not exclude the possibility that S100B acts, on its own, as an adipocyte-derived neurotrophic factor.

1. Olzmann, J. A. & Carvalho, P. Dynamics and functions of lipid droplets. *Nature Reviews Molecular Cell Biology* vol. 20 137–155 (2019).
2. Olarte, M. J., Swanson, J. M. J., Walther, T. C. & Farese, R. V. The CYTOLD and ERTOLD pathways for lipid droplet–protein targeting. *Trends in Biochemical Sciences* vol. 47 39–51 (2022).
3. Zhou, Z. *et al.* Cidea-deficient mice have lean phenotype and are resistant to obesity. *Nat. Genet.* **35**, 49–56 (2003).
4. Puri, V. *et al.* Fat-specific protein 27, a novel lipid droplet protein that enhances triglyceride storage. *J. Biol. Chem.* **282**, 34213–34218 (2007).
5. Nishino, N. *et al.* FSP27 contributes to efficient energy storage in murine white adipocytes by promoting the formation of unilocular lipid droplets. *J. Clin. Invest.* **118**, 2808–2821 (2008).
6. Toh, S. Y. *et al.* Up-regulation of mitochondrial activity and acquirement of brown adipose tissue-like property in the white adipose tissue of Fsp27 deficient mice. *PLoS One* **3**, e2890 (2008).
7. Ye, J. *et al.* Cideb, an ER- and Lipid Droplet-Associated Protein, Mediates VLDL Lipidation and Maturation by Interacting with Apolipoprotein B. *Cell Metab.* **9**, 177–190

- (2009).
8. Rubio-Cabezas, O. *et al.* Partial lipodystrophy and insulin resistant diabetes in a patient with a homozygous nonsense mutation in CIDEC. *EMBO Mol. Med.* **1**, 280–287 (2009).
  9. Gong, J. *et al.* Fsp27 promotes lipid droplet growth by lipid exchange and transfer at lipid droplet contact sites. *J. Cell Biol.* **195**, 953–963 (2011).
  10. Sun, Z. *et al.* Perilipin1 promotes unilocular lipid droplet formation through the activation of Fsp27 in adipocytes. *Nat. Commun.* **4**, 1–15 (2013).
  11. Zhang, S. *et al.* Cidea Control of Lipid Storage and Secretion in Mouse and Human Sebaceous Glands. *Mol. Cell. Biol.* **34**, 1827–1838 (2014).
  12. Wu, L. Z. *et al.* Cidea controls lipid droplet fusion and lipid storage in brown and white adipose tissue. *Sci. China Life Sci.* **57**, 107–116 (2014).
  13. Barneda, D. *et al.* The brown adipocyte protein CIDEA promotes lipid droplet fusion via a phosphatidic acid-binding amphipathic helix. *Elife* **4**, (2015).
  14. Shin, H. *et al.* Lipolysis in Brown Adipocytes Is Not Essential for Cold-Induced Thermogenesis in Mice. *Cell Metab.* **26**, 764-777.e5 (2017).
  15. Schreiber, R. *et al.* Cold-Induced Thermogenesis Depends on ATGL-Mediated Lipolysis in Cardiac Muscle, but Not Brown Adipose Tissue. *Cell Metab.* **26**, 753-763.e7 (2017).
  16. Chitraju, C., Fischer, A. W., Farese, R. V. & Walther, T. C. Lipid Droplets in Brown Adipose Tissue Are Dispensable for Cold-Induced Thermogenesis. *Cell Rep.* **33**, (2020).
  17. Zeng, X. *et al.* Innervation of thermogenic adipose tissue via a calsyntenin 3 $\beta$ -S100b axis. *Nature* **569**, 229–235 (2019).
  18. Hintsch, G. *et al.* The calsyntenins - A family of postsynaptic membrane proteins with distinct neuronal expression patterns. *Mol. Cell. Neurosci.* **21**, 393–409 (2002).
  19. Pettem, K. L. *et al.* The Specific  $\alpha$ -Neurexin Interactor Calyntenin-3 Promotes Excitatory and Inhibitory Synapse Development. *Neuron* **80**, 113–128 (2013).
  20. Um, J. W. *et al.* Calyntenins Function as Synaptogenic Adhesion Molecules in Concert with Neurexins. *Cell Rep.* **6**, 1096–1109 (2014).
  21. Lu, Z. *et al.* Calyntenin-3 molecular architecture and interaction with neurexin 1 $\alpha$ . *J. Biol. Chem.* **289**, 34530–34542 (2014).
  22. Kim, H. *et al.* Calyntenin-3 interacts with both a- And b-neurexins in the regulation of excitatory synaptic innervation in specific Schaffer collateral pathways. *J. Biol. Chem.* **295**, 9244–9262 (2020).
  23. Chi, J. *et al.* Three-Dimensional Adipose Tissue Imaging Reveals Regional Variation in Beige Fat Biogenesis and PRDM16-Dependent Sympathetic Neurite Density. *Cell Metab.* **27**, 226-236.e3 (2018).
  24. Chi, J., Crane, A., Wu, Z. & Cohen, P. Adipo-clear: A tissue clearing method for three-dimensional imaging of adipose tissue. *J. Vis. Exp.* **2018**, 58271 (2018).
  25. Wang, P. *et al.* A leptin–BDNF pathway regulating sympathetic innervation of adipose tissue. *Nature* **583**, 839–844 (2020).
  26. Chi, J. *et al.* Early postnatal interactions between beige adipocytes and sympathetic neurites regulate innervation of subcutaneous fat. *Elife* **10**, 1–62 (2021).
