# Supplementary material
Source: PubMed Central journal article supplement (PMC9995219)
Supplement: NIHMS1875067-supplement-Suppl_Fig_1.pdf [file NIHMS1875067-supplement-Suppl_Fig_1.pdf]

All DNA electrophoresis gels are presented in full in Extended Data Fig. 1e, 1f, 10f.  
Silver stained SDS-PAGE gel is presented in full in Extended Data Fig. 9e.  
All uncropped Western blots are presented below.

Fig. 1d

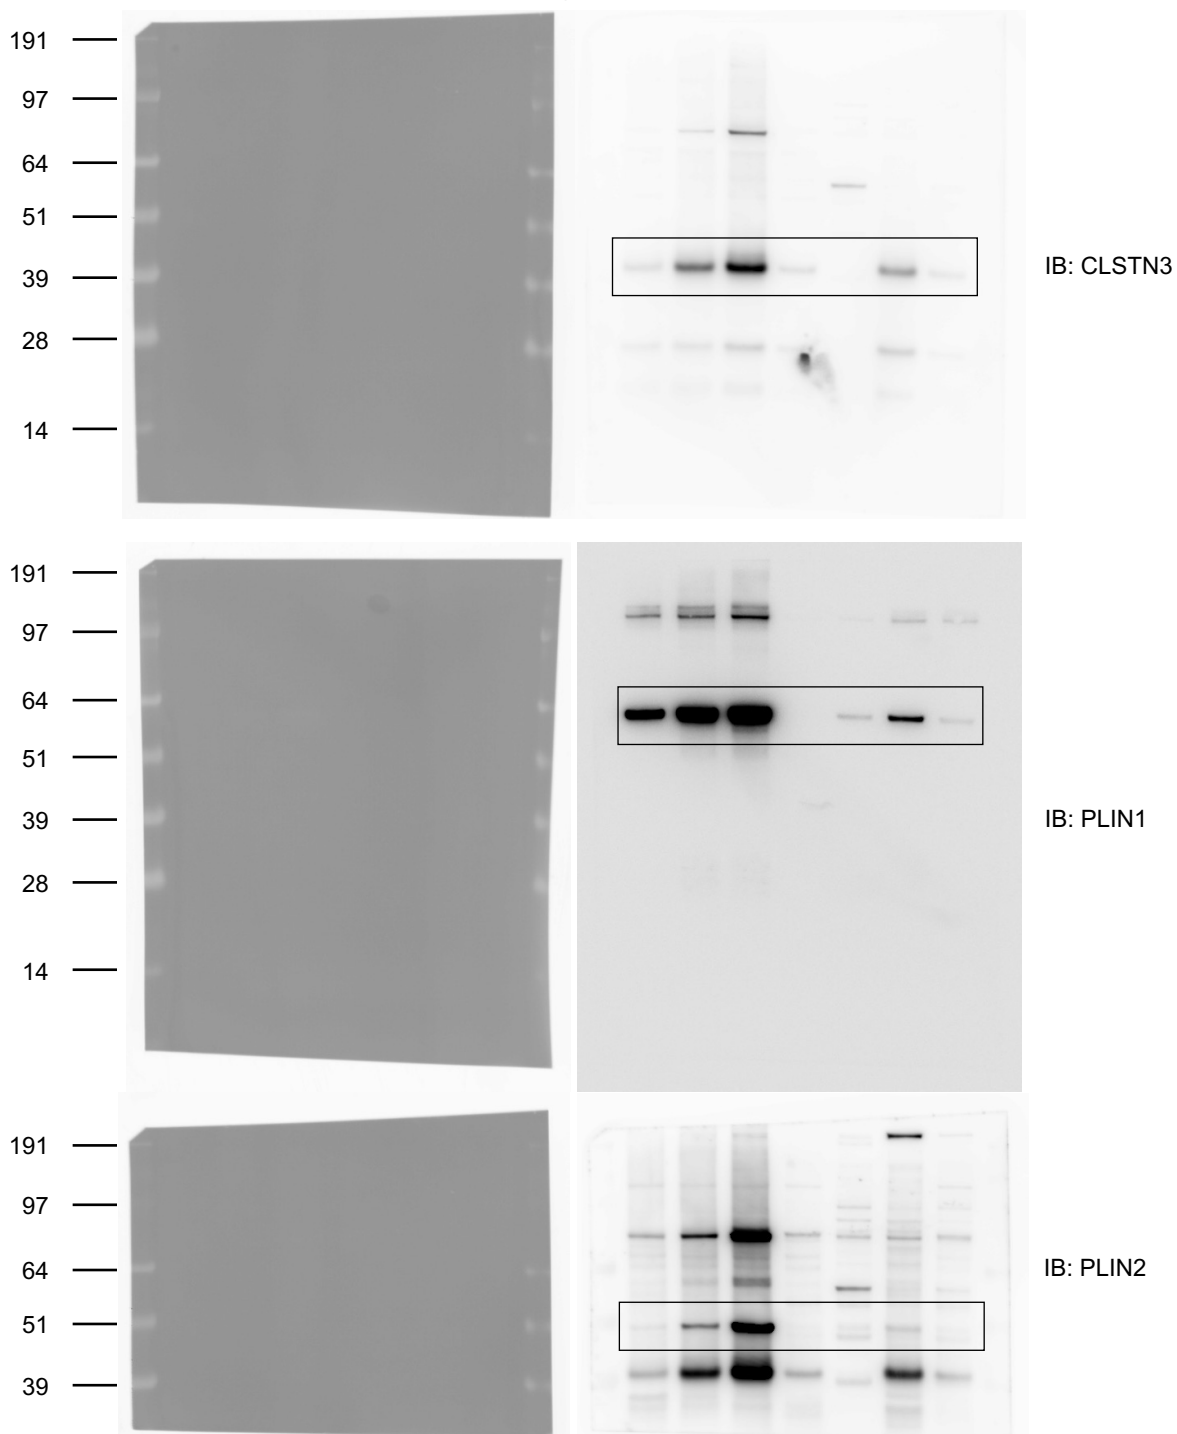

Fig. 1d, cont.

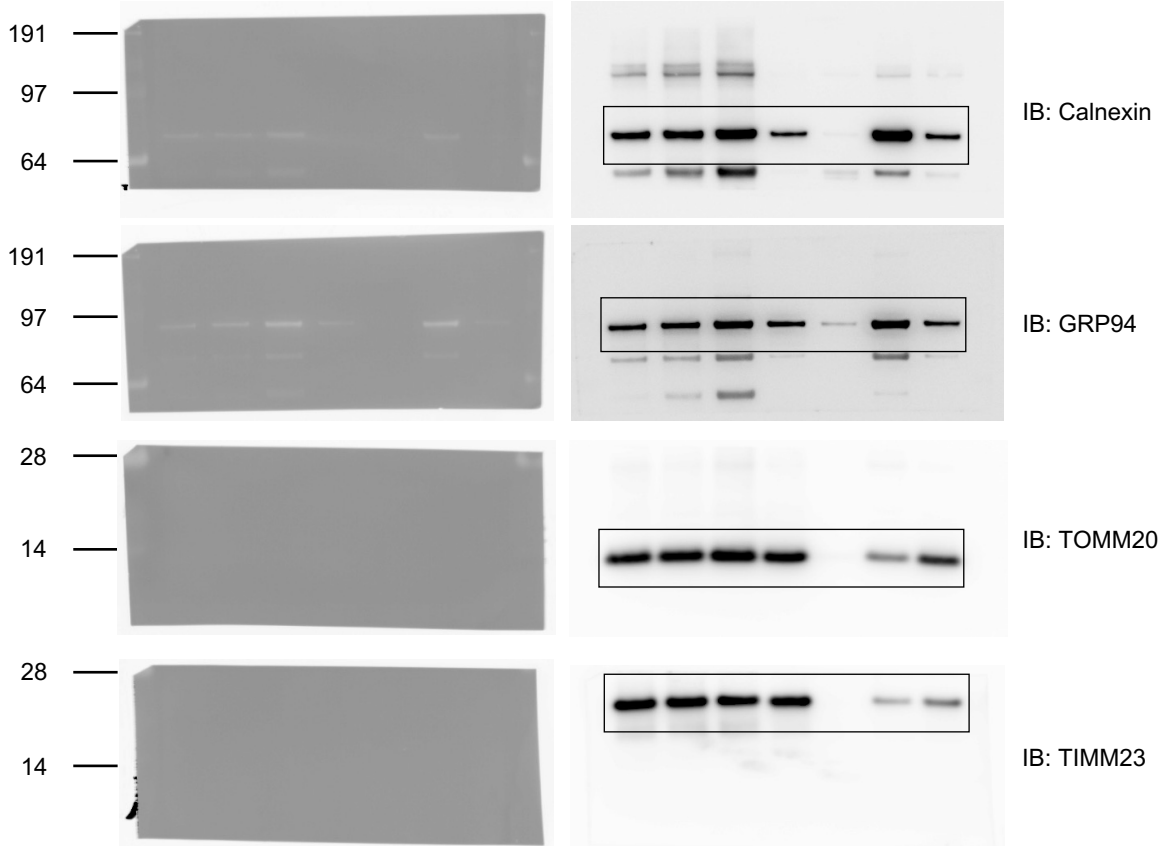

Fig. 3f

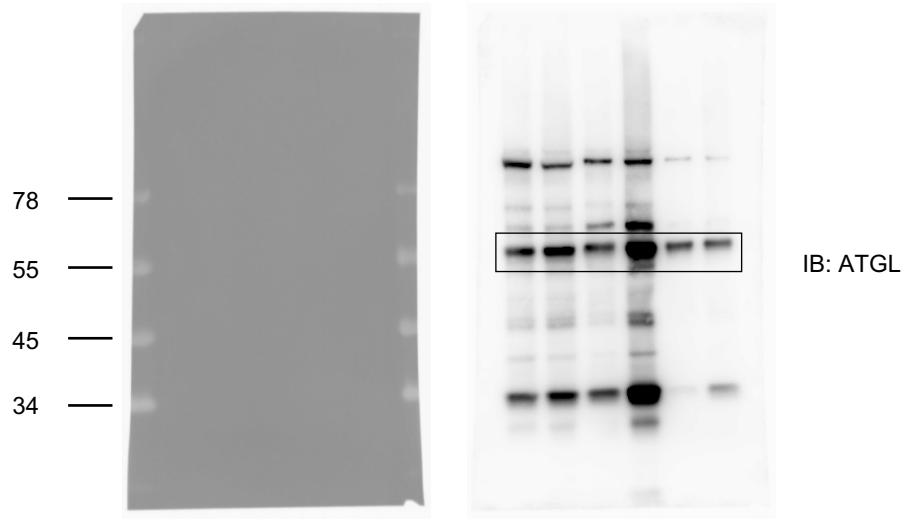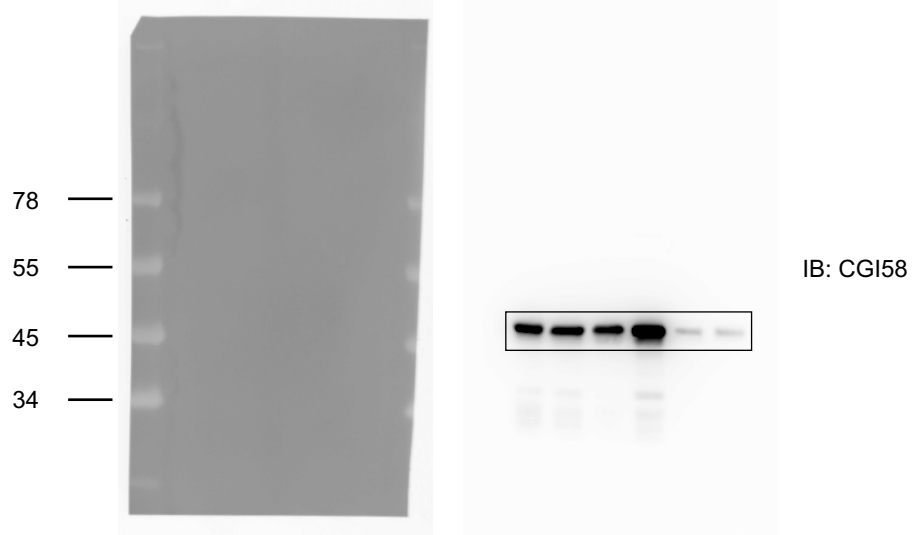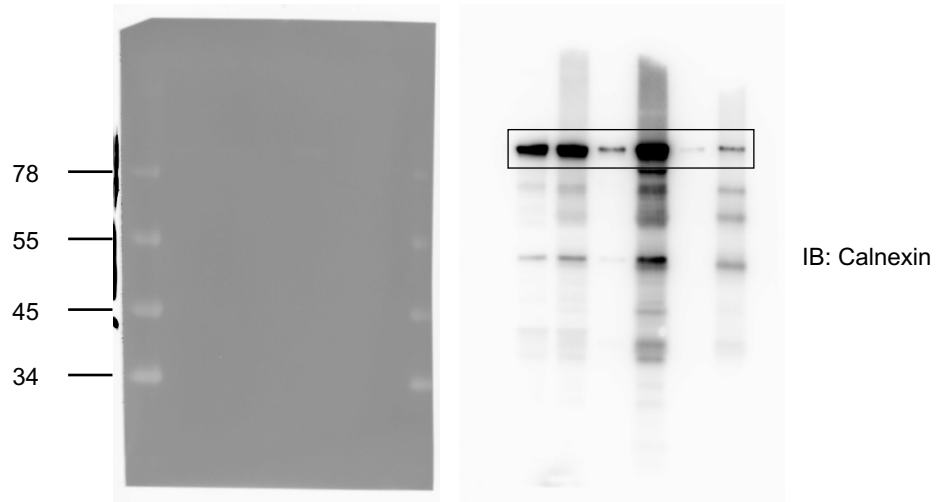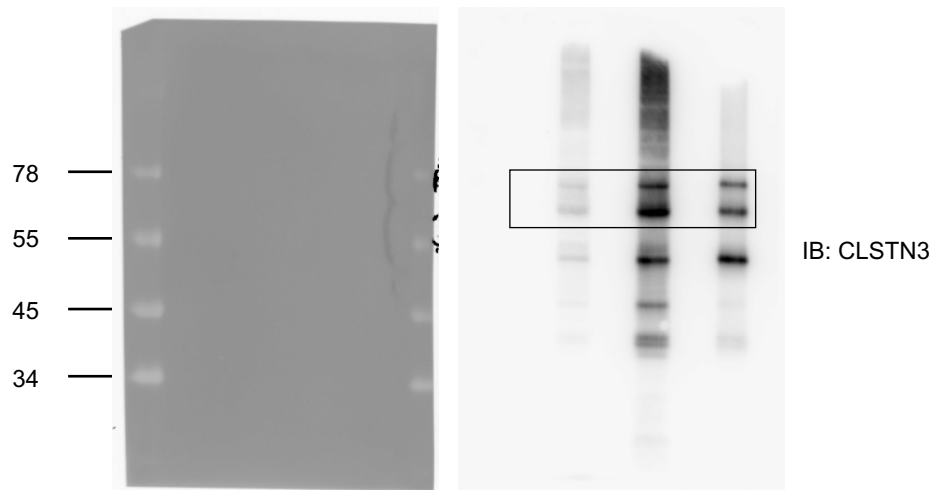

Fig. 5b

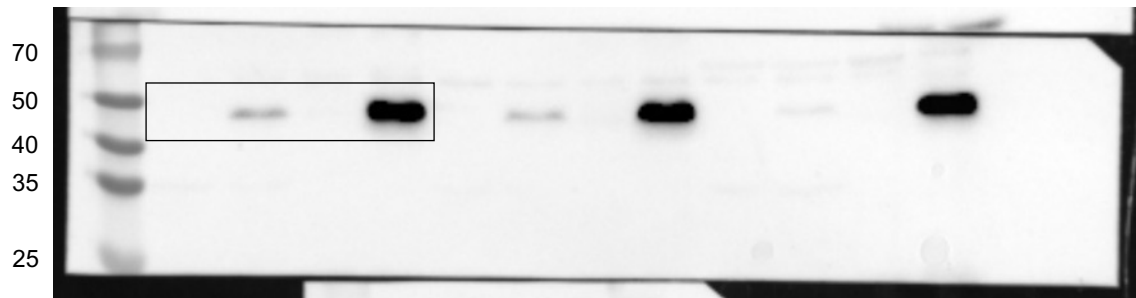

IB: Flag

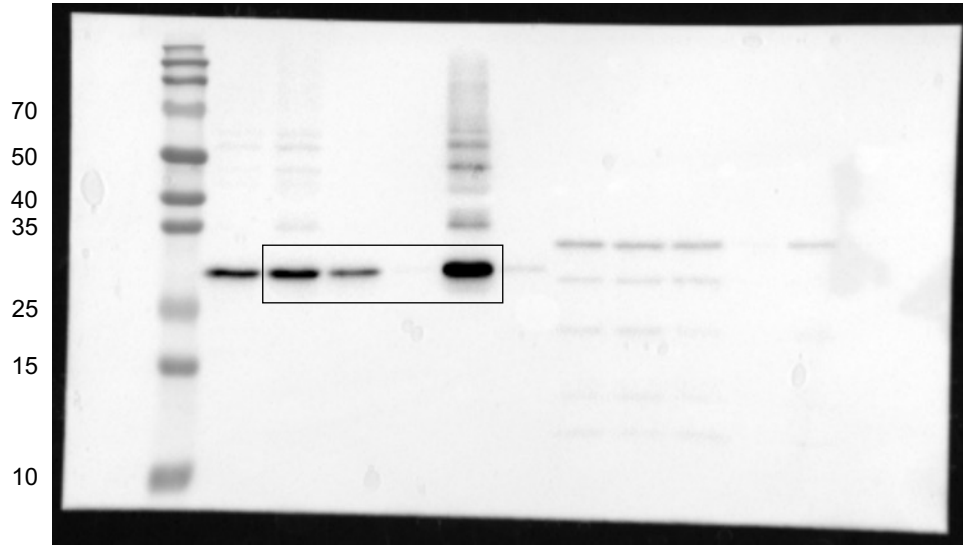

IB: HA

Fig. 5c

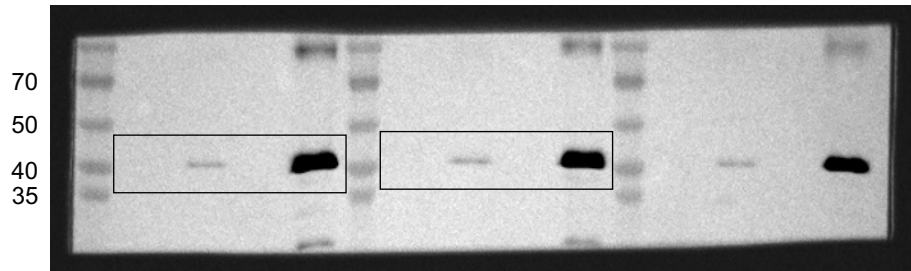

CIDEA-C – IB: Flag

CIDEA-N – IB: Flag

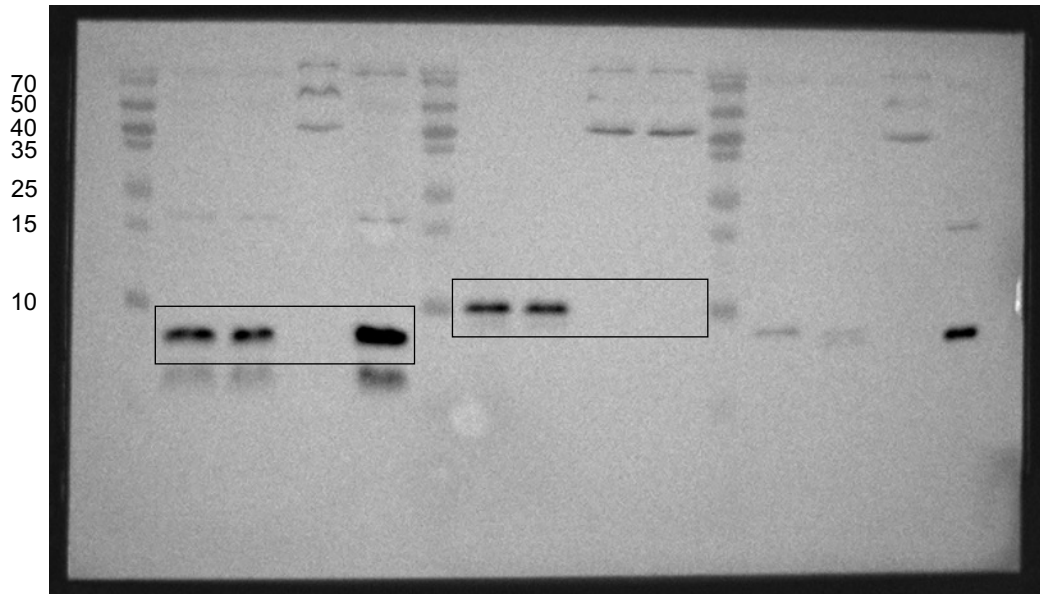

CIDEA-C – IB: HA

CIDEA-N – IB: HA

Fig. 5i

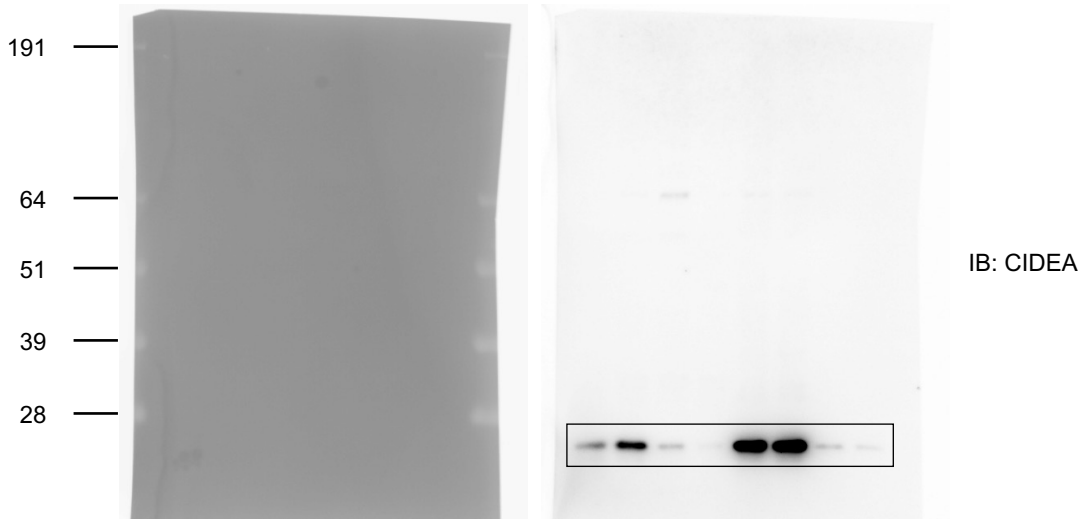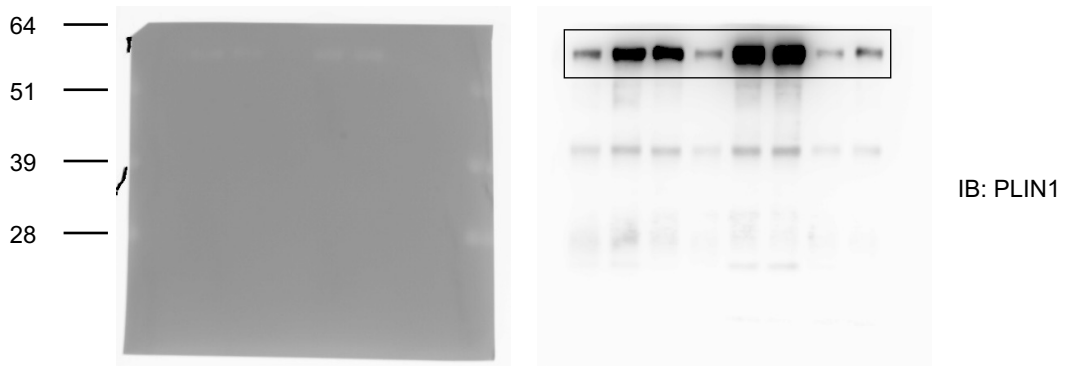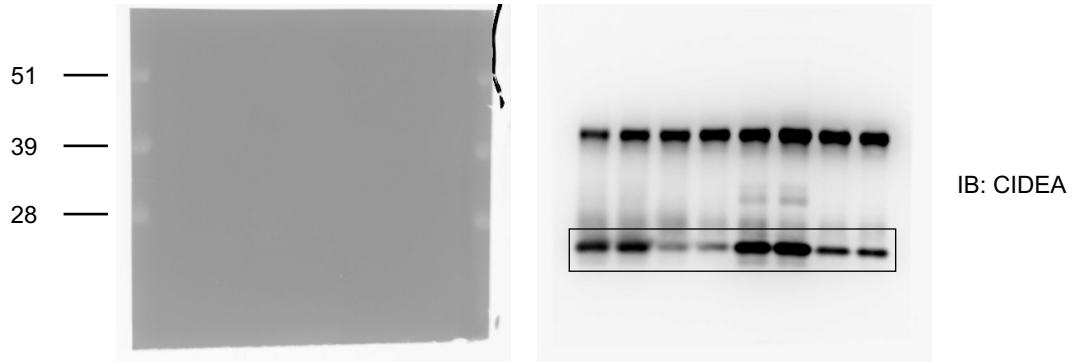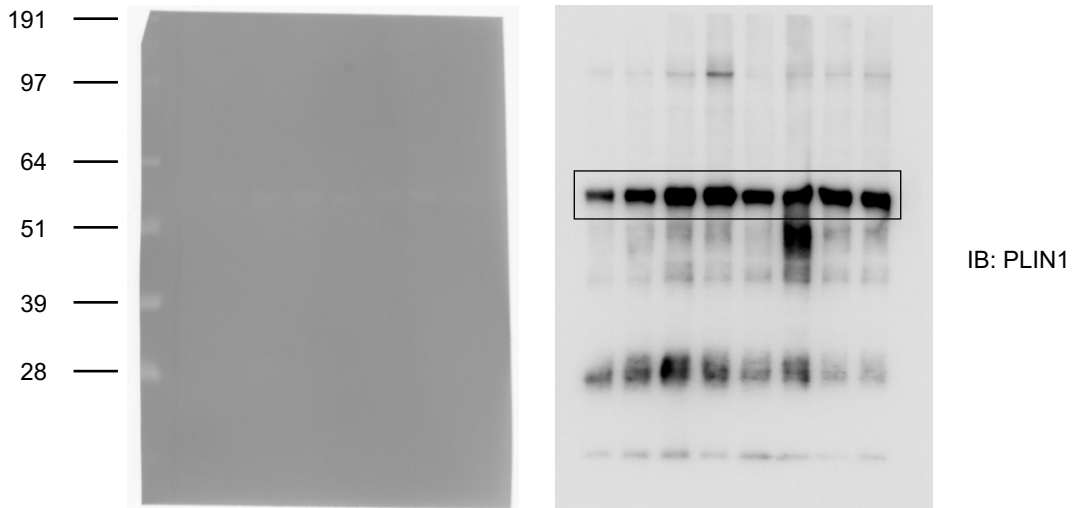

Extended Data Fig. 2a

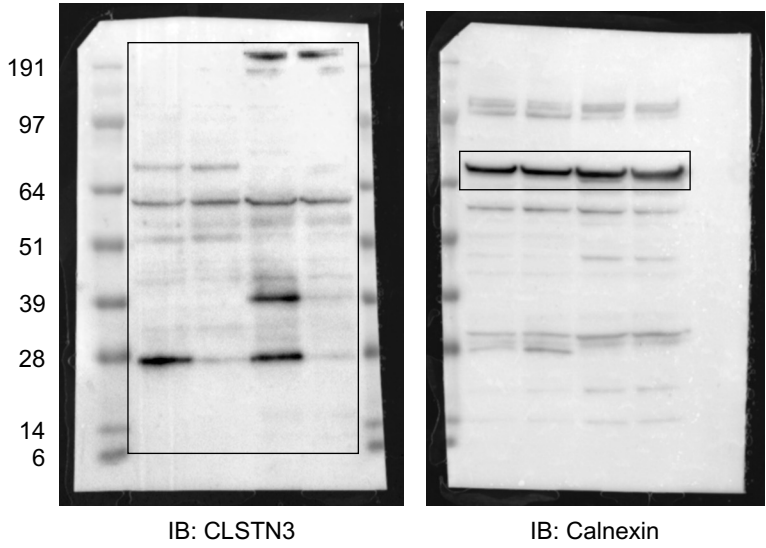

Extended Data Fig. 2b

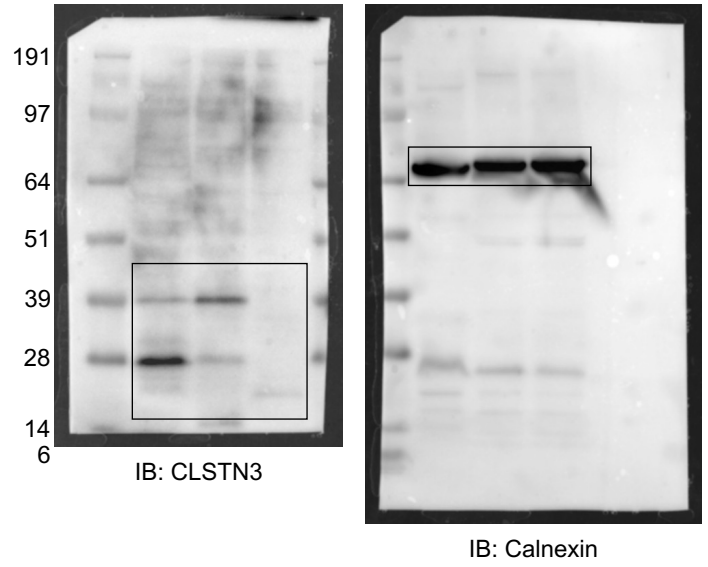

Extended Data Fig. 2c

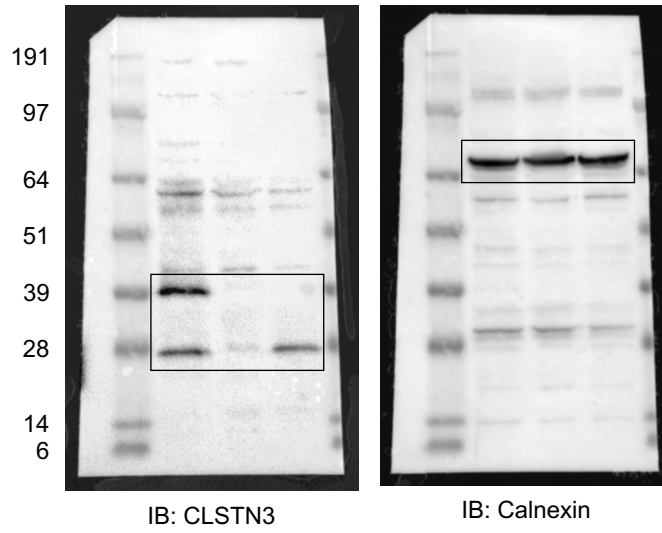

Extended Data Fig. 2d

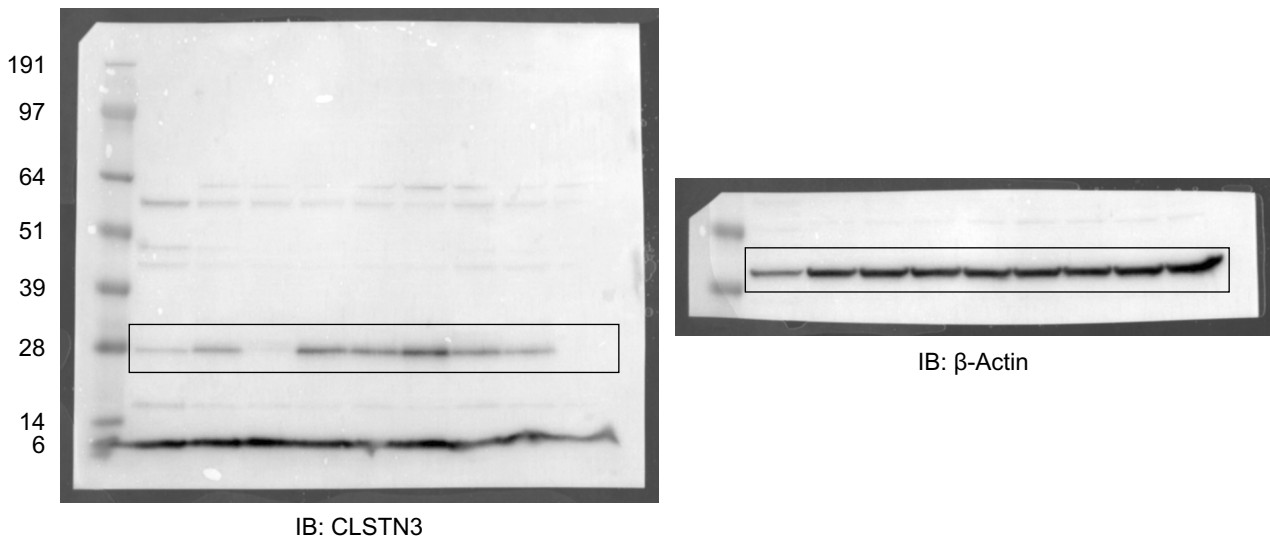

Extended Data Fig. 2e

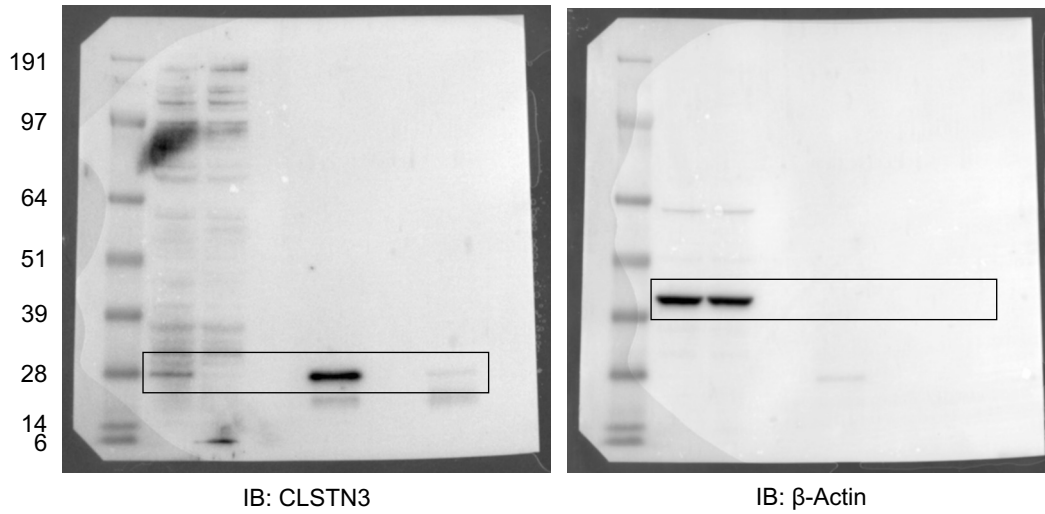

Extended Data Fig. 3b

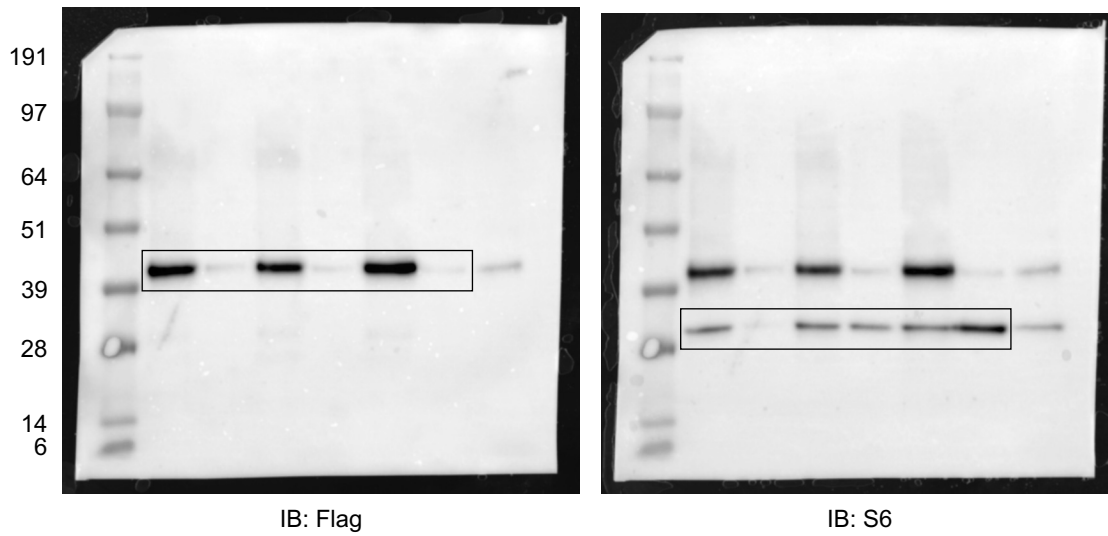

Extended Data Fig. 3c

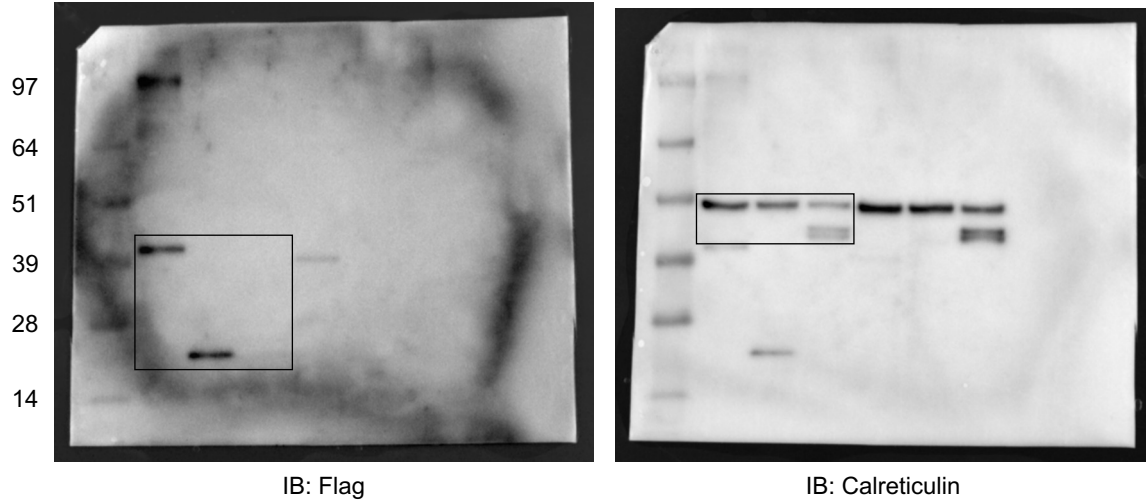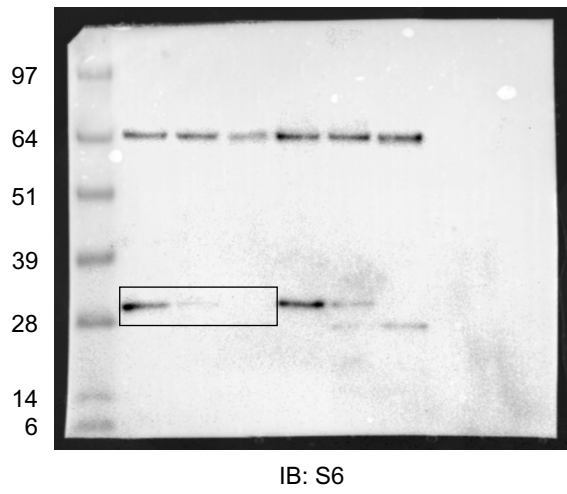

Extended Data Fig. 4c

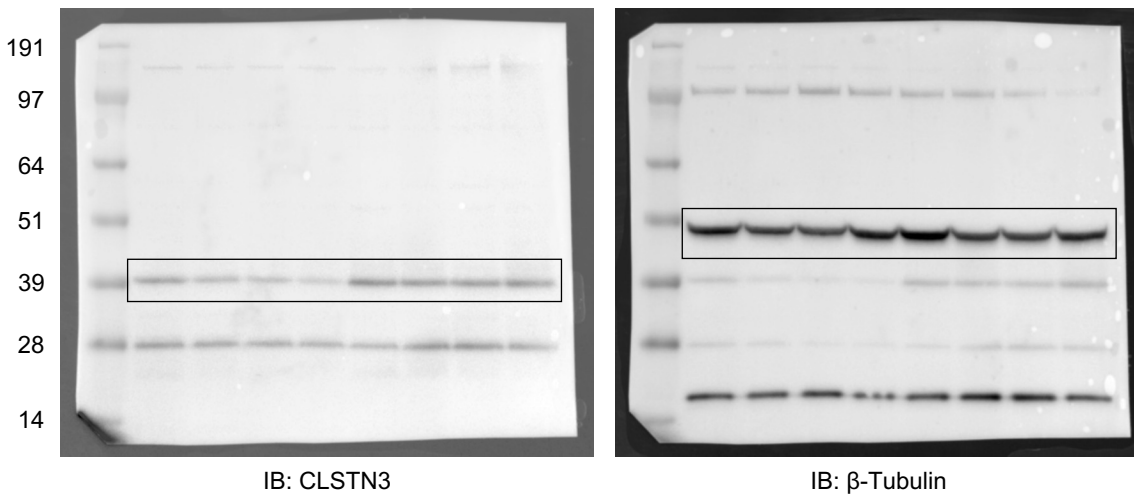



Extended Data Fig. 4e

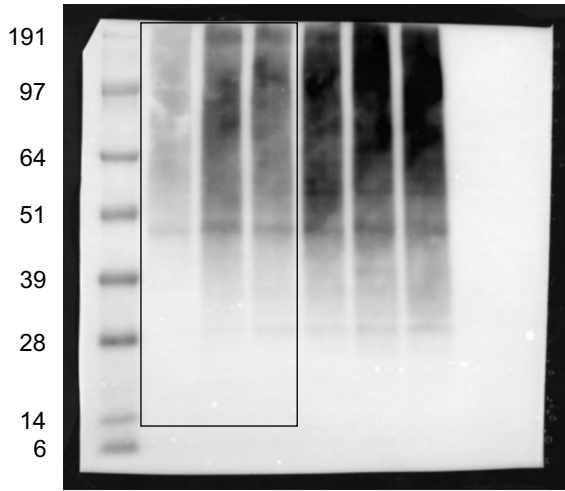

IP – IB: HA-Ub

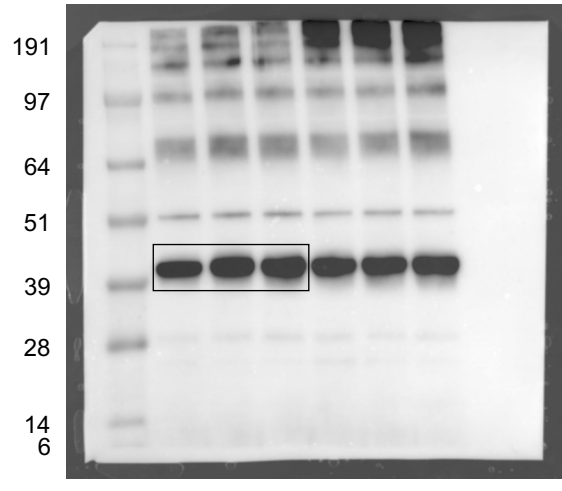

IP – IB: Flag

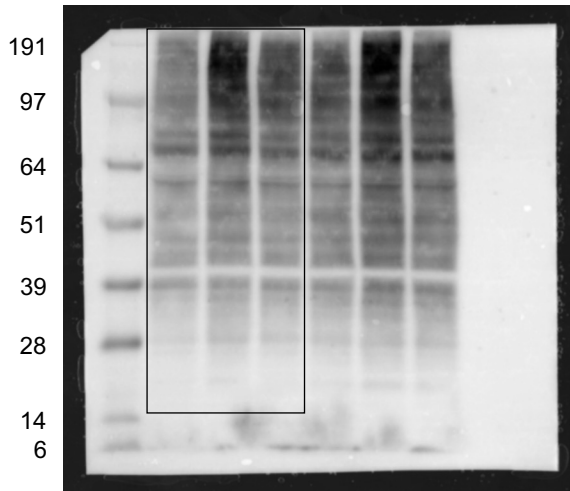

Input – IB: HA-Ub

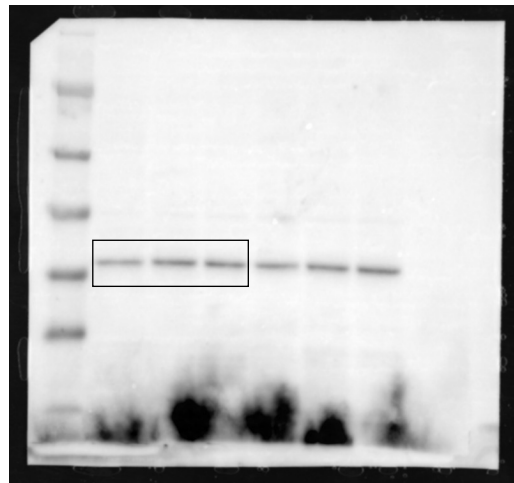

Input – IB: Flag

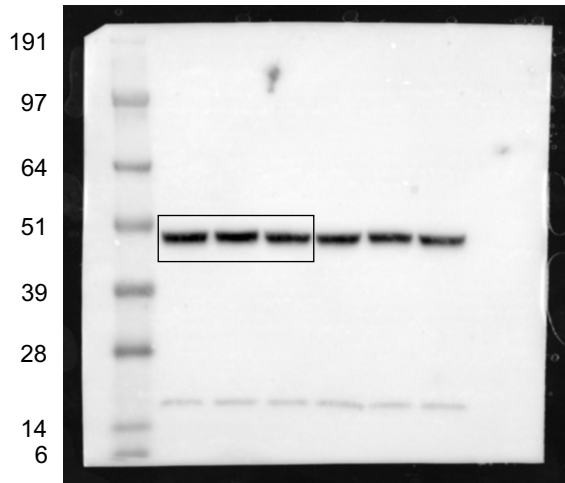

Input – IB:  $\beta$ -Tubulin

Extended Data Fig. 4f

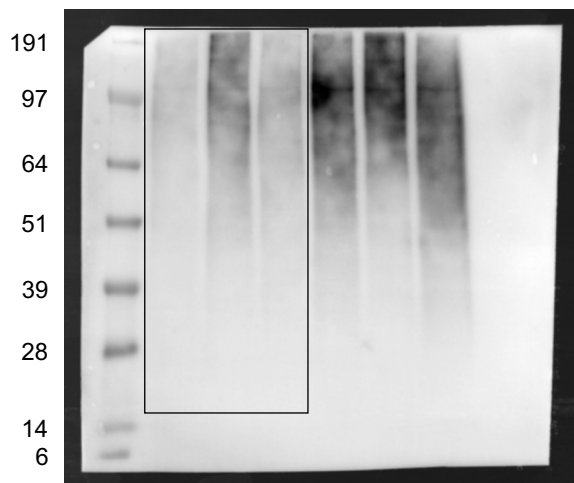

IP – IB: Ub

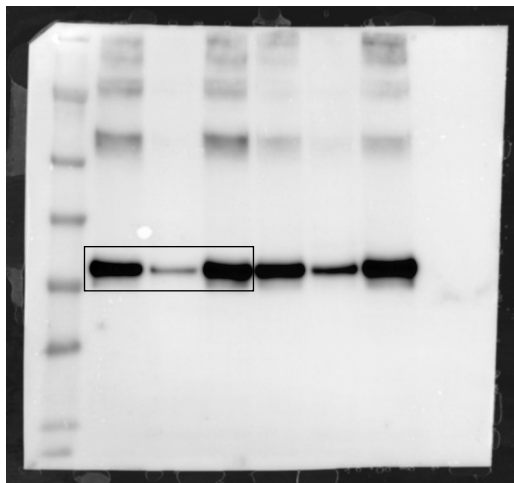

IP – IB: Flag

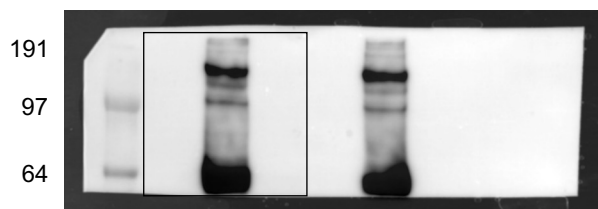

IP – IB: HA

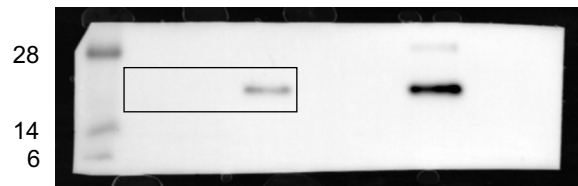

IP – IB: myc

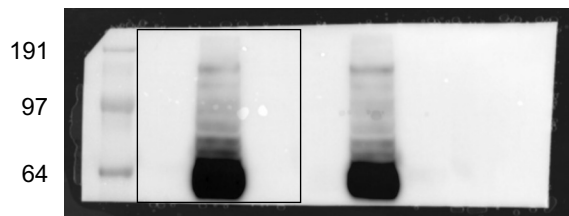

Input – IB: HA

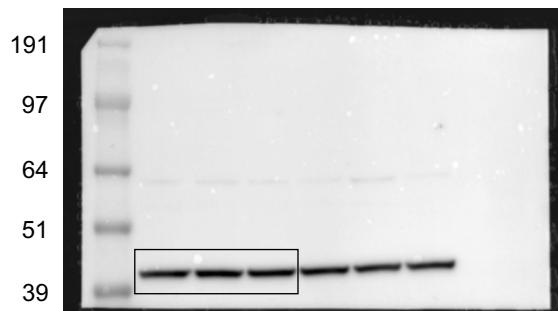

Input – IB:  $\beta$ -Actin

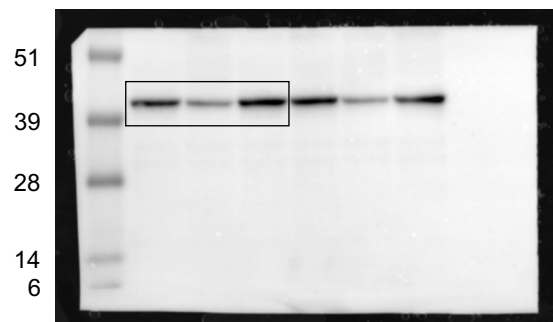

Input – IB: Flag

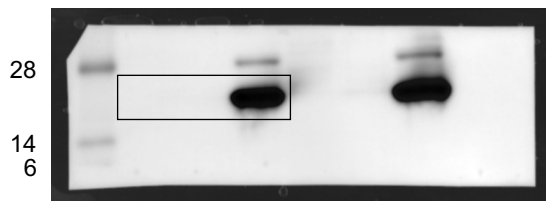

Input – IB: myc

Extended Data Fig. 4g

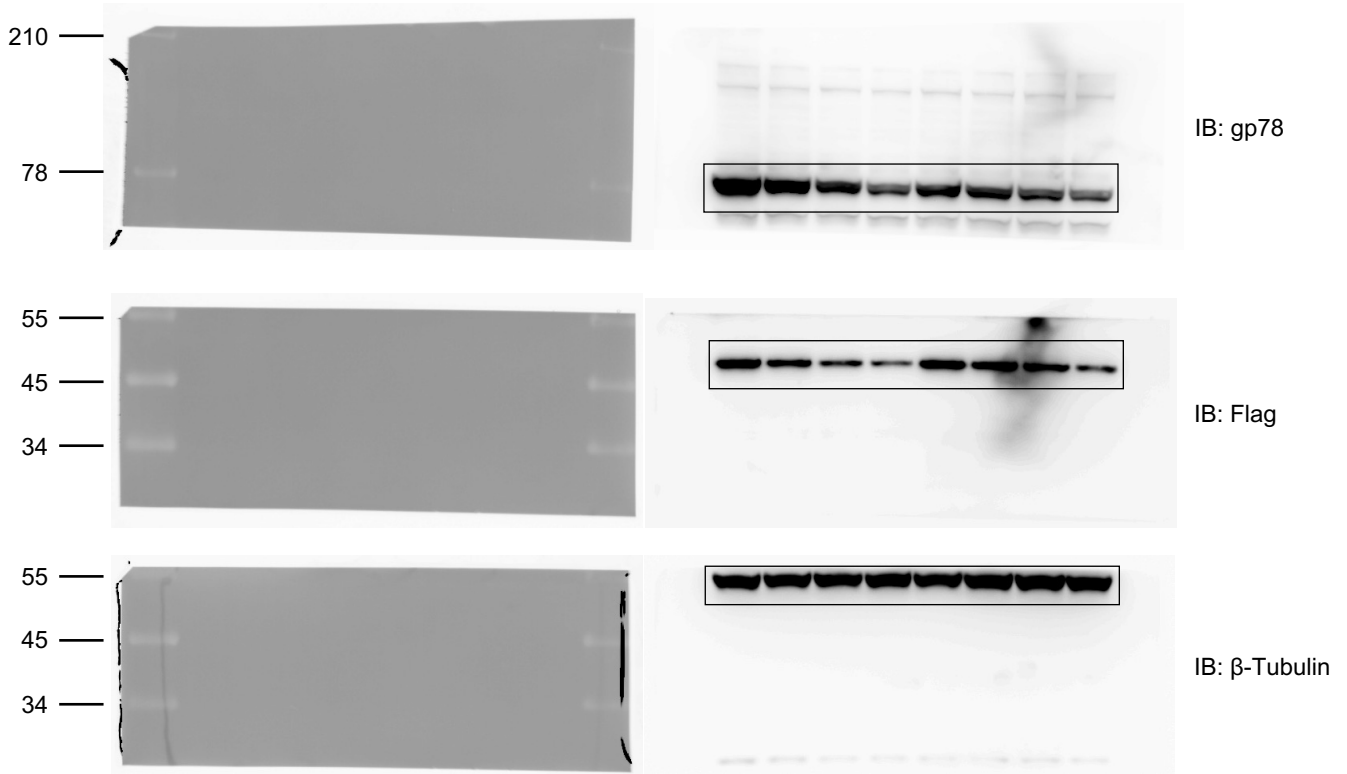

Extended Data Fig. 5b

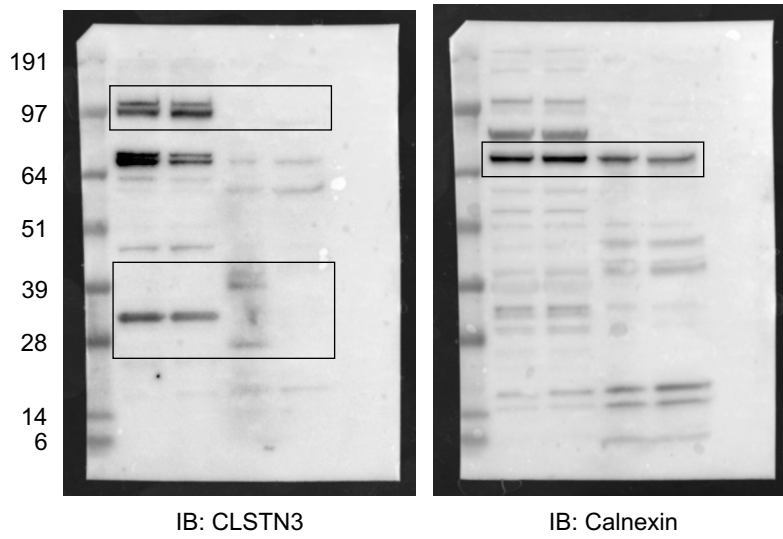

Extended Data Fig. 6a

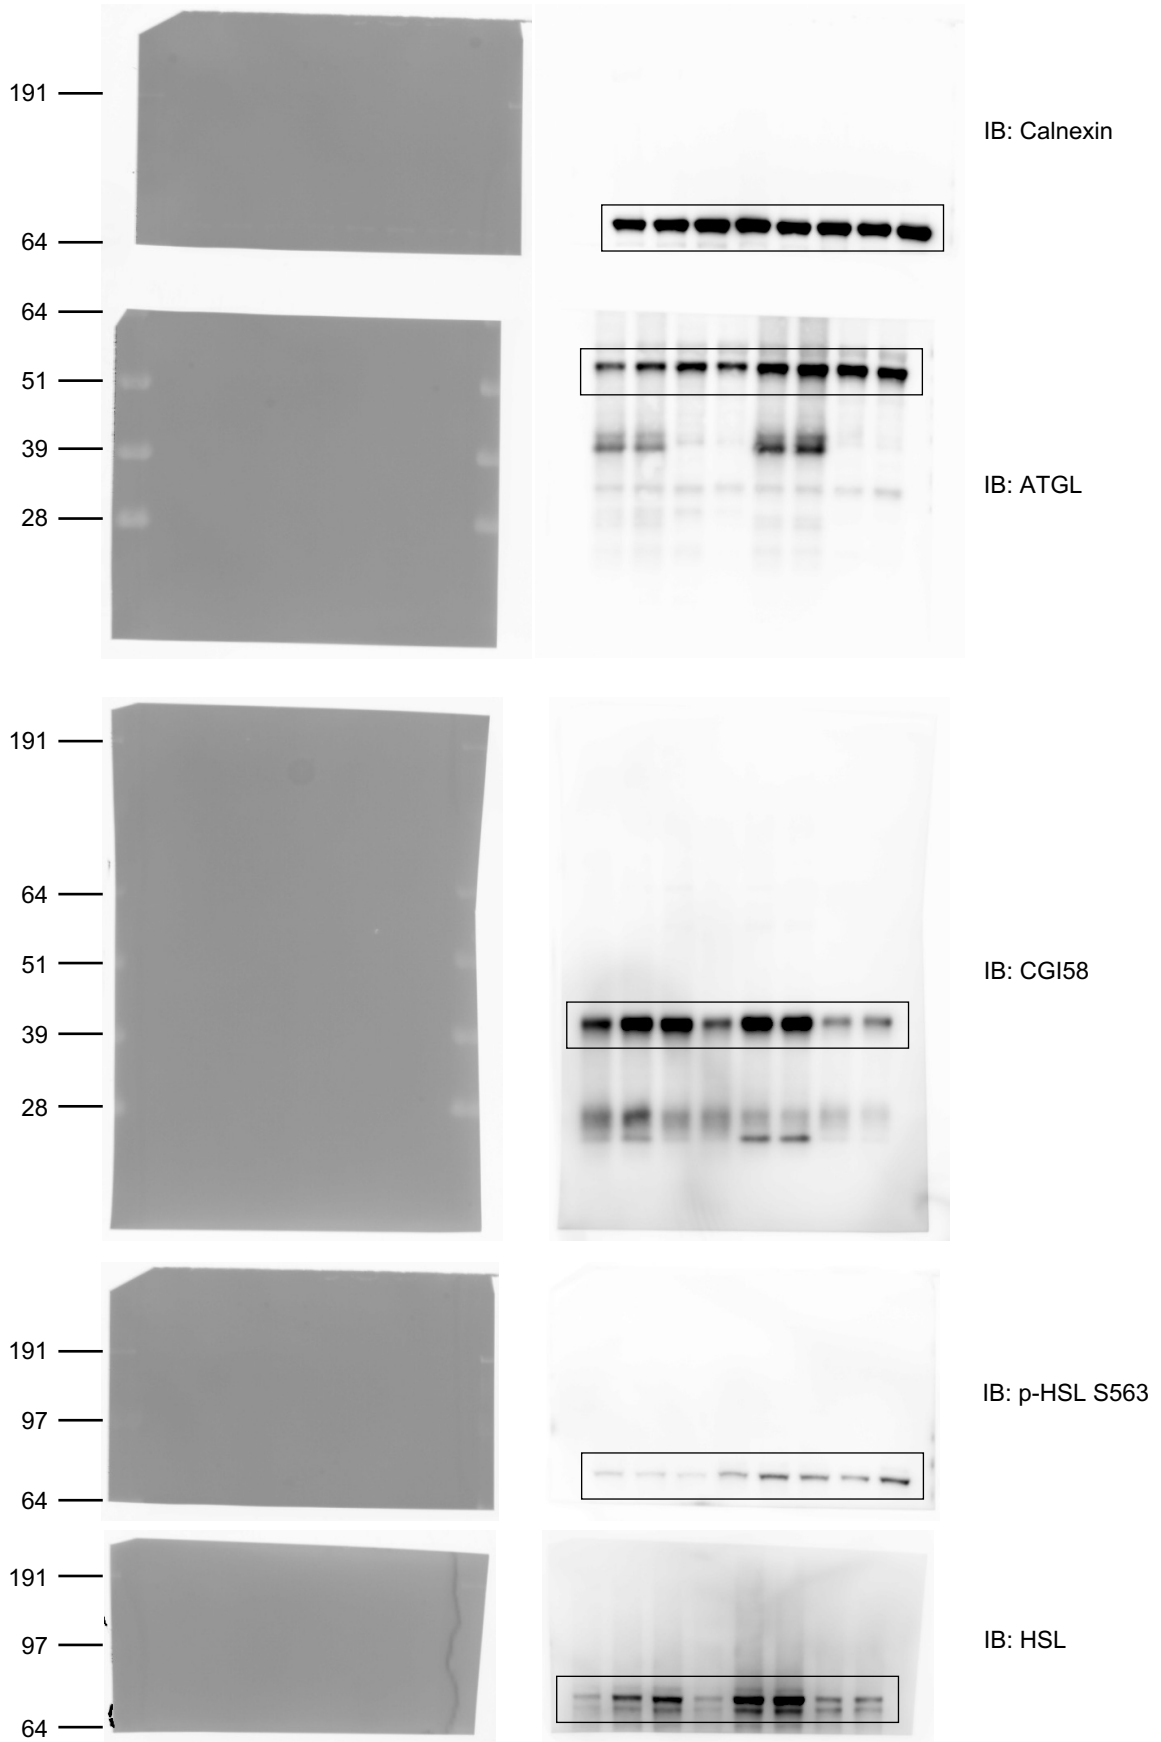

Extended Data Fig. 6a, cont.

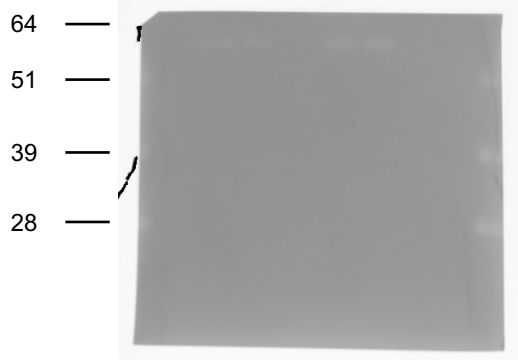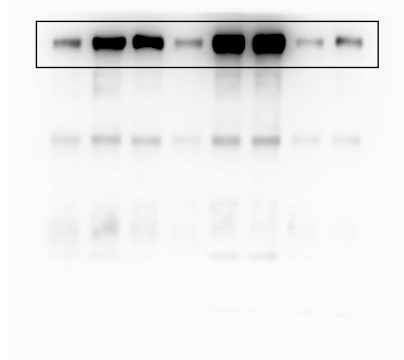

IB: PLIN1\*  
\*Same as Fig. 5i

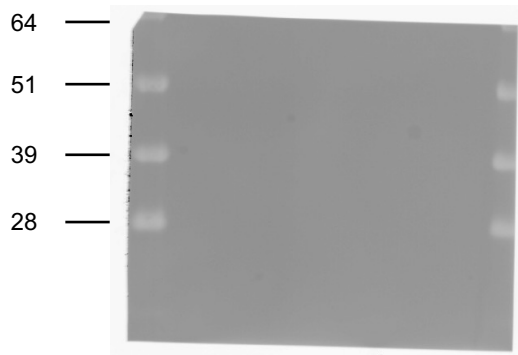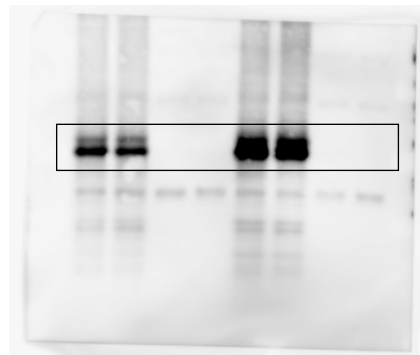

IB: CLSTN3

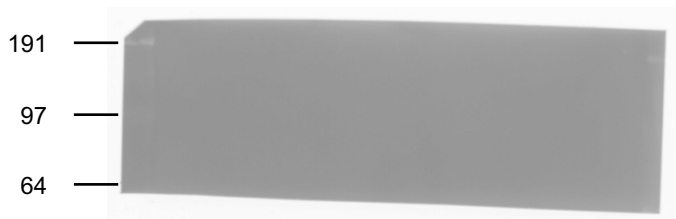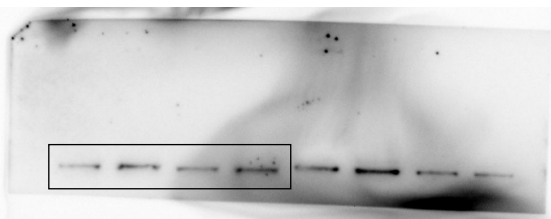

IB: p-HSL S563

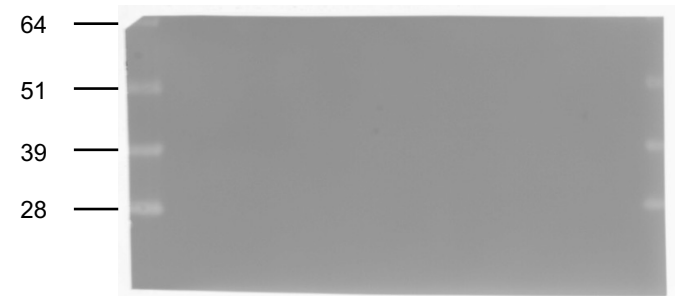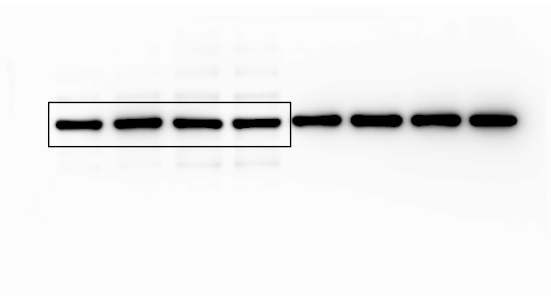

IB:  $\beta$ -Actin

Extended Data Fig. 6b

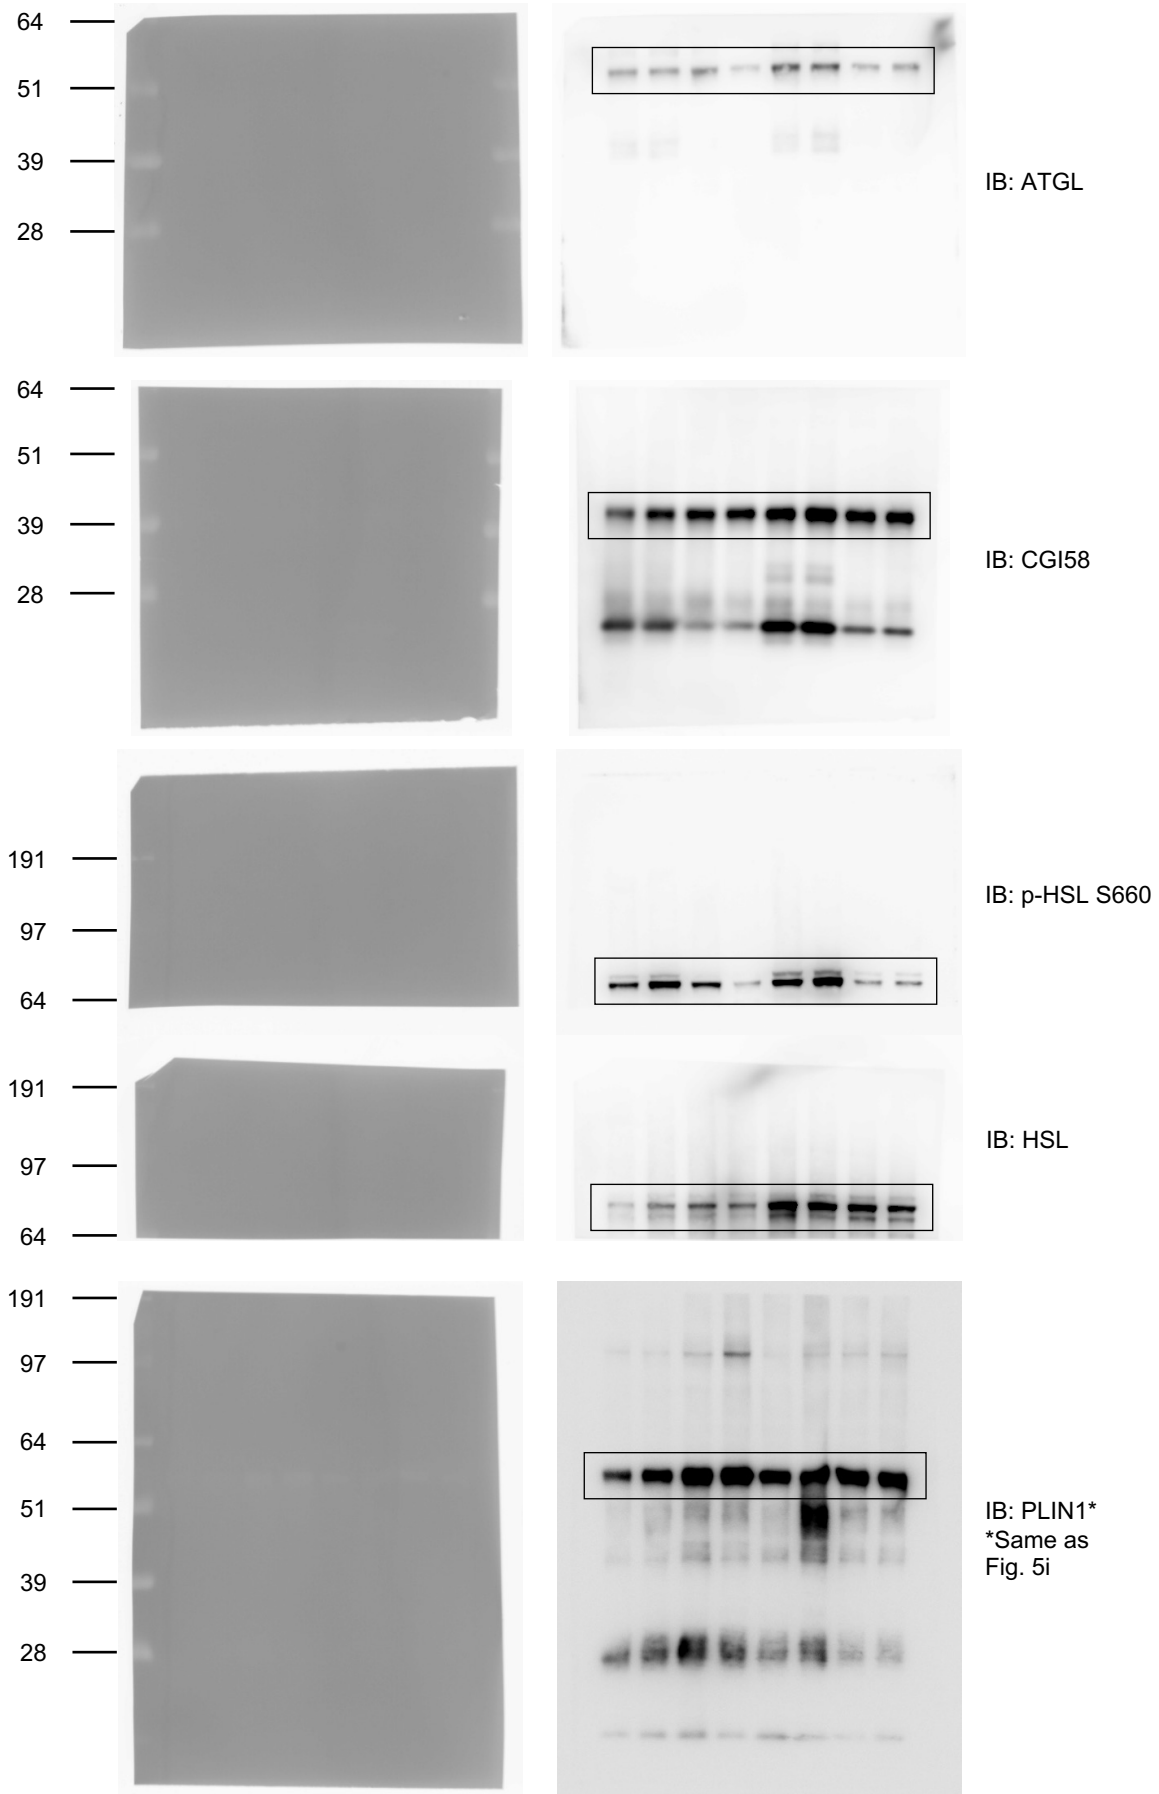

Extended Data Fig. 6b, cont.

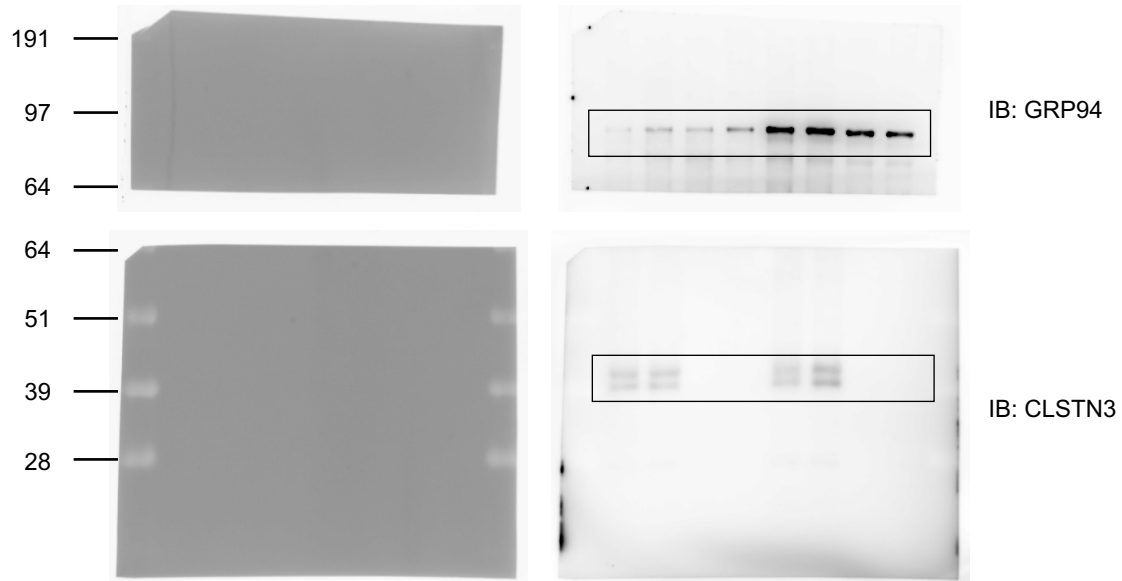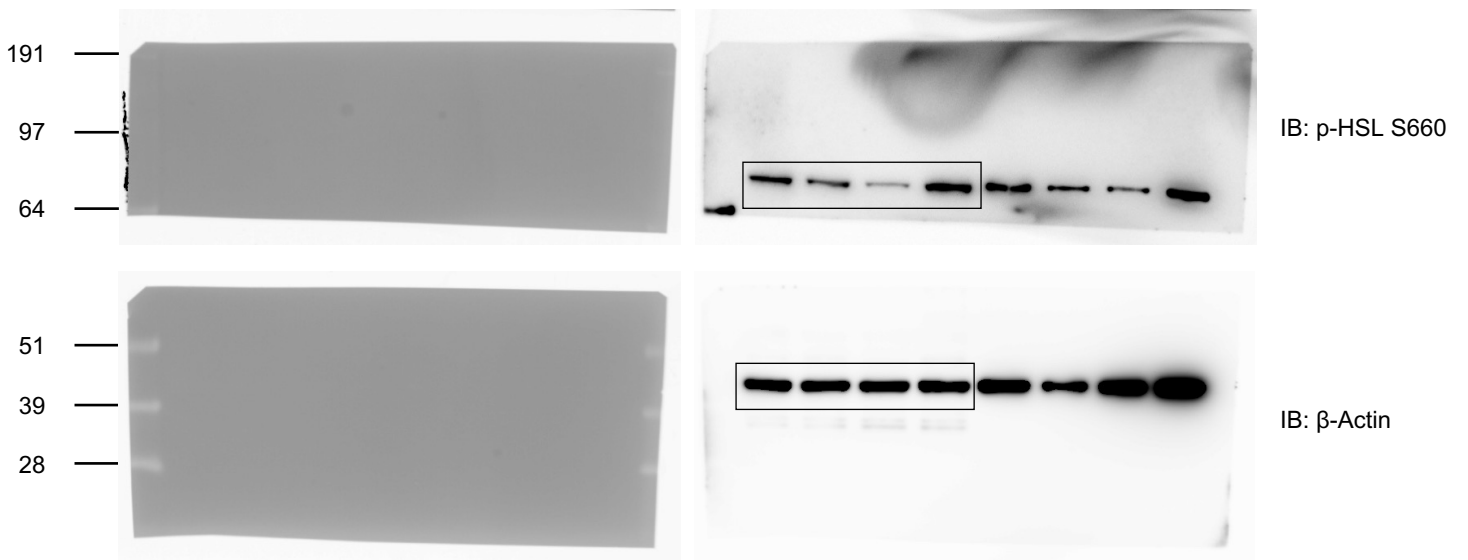

Extended Data Fig. 8e

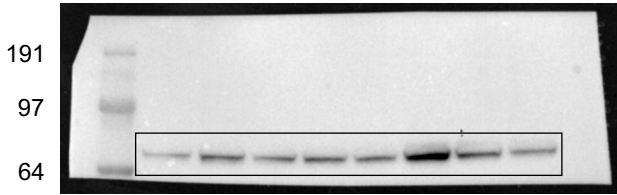

IB: p-HSL S660

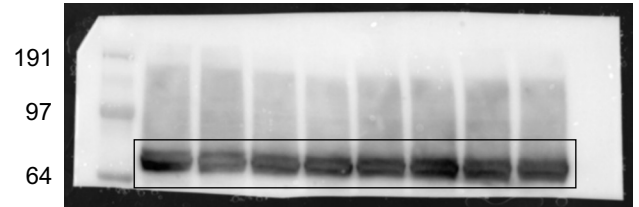

IB: HSL

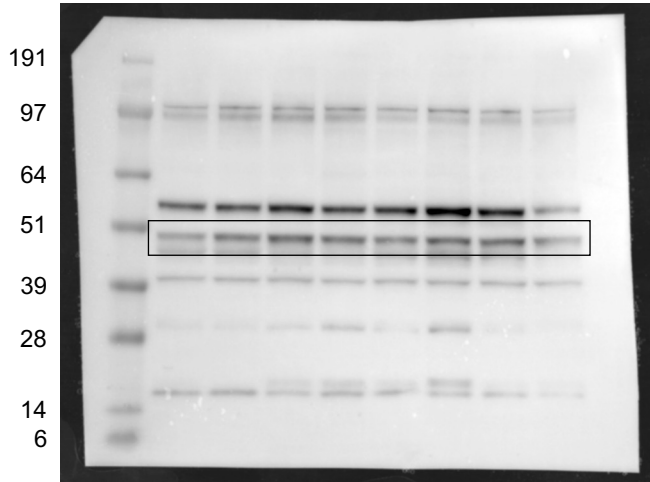

IB:  $\beta$ -Tubulin

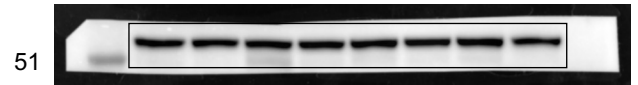

IB: TH

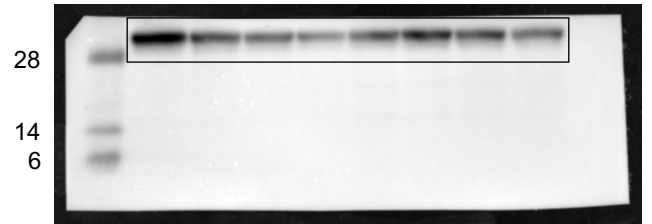

IB: UCP1

Extended Data Fig. 8f

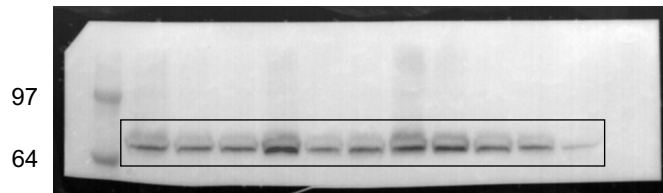

IB: p-HSL S660

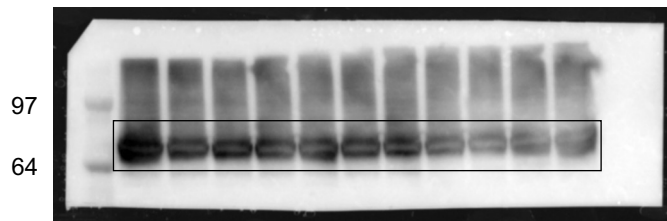

IB: HSL

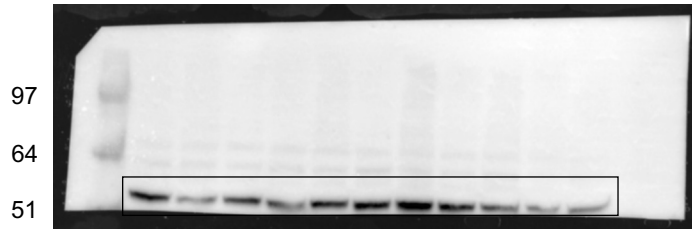

IB: TH

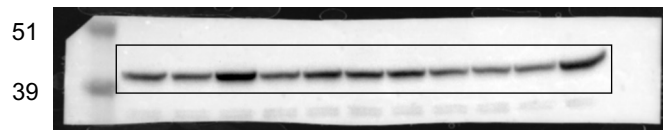

IB:  $\beta$ -Actin

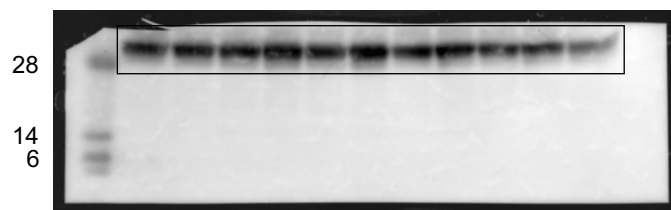

IB: UCP1



Extended Data Fig. 8g

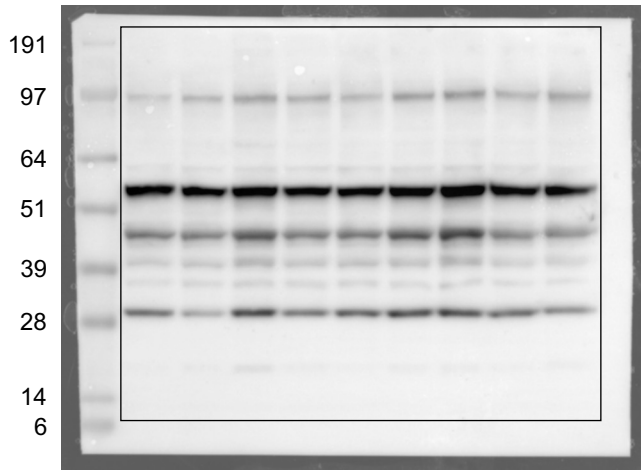

IB: p-PKA substrate

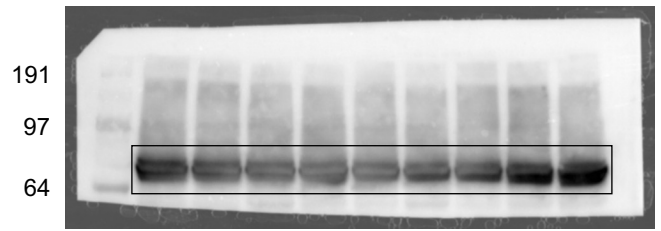

IB: HSL

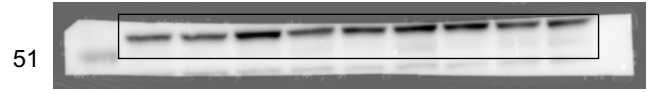

IB: TH

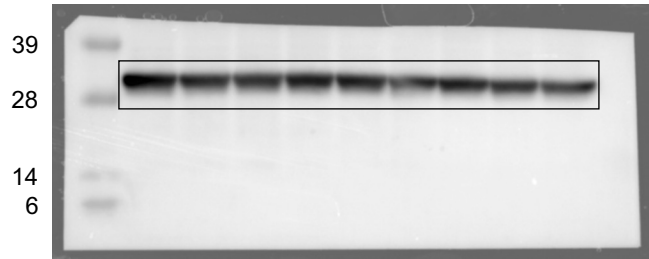

IB: UCP1

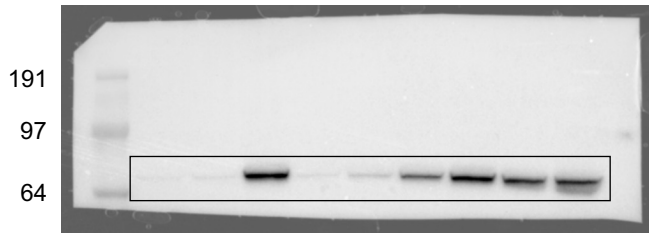

IB: p-HSL S660

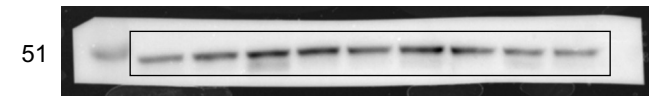

IB: beta-Tubulin

Extended Data Fig. 8h

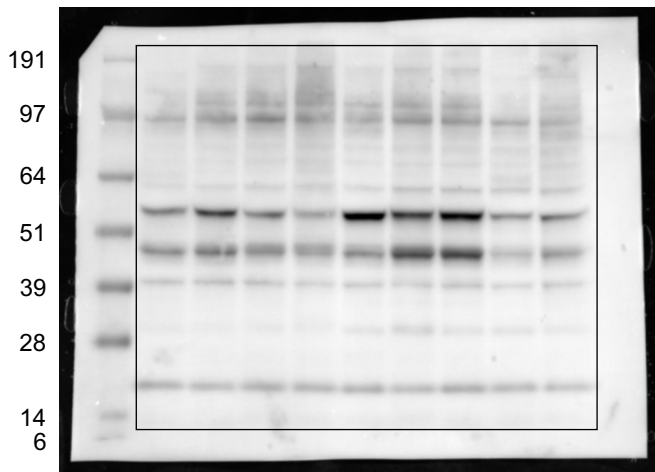

IB: p-PKA substrate

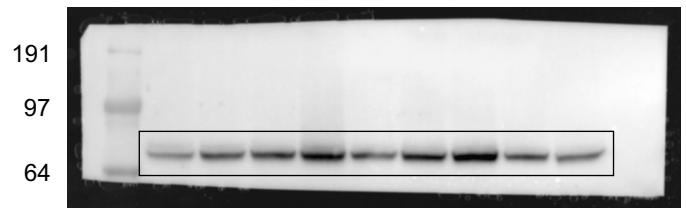

IB: p-HSL S660

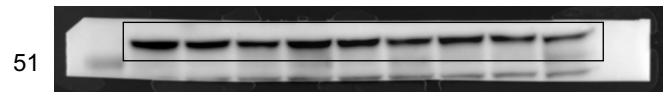

IB: TH

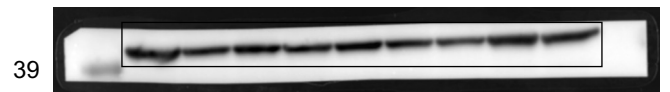

IB: beta-Actin

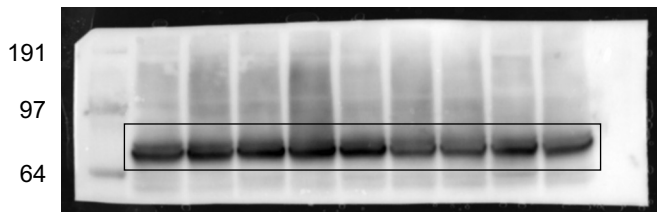

IB: HSL

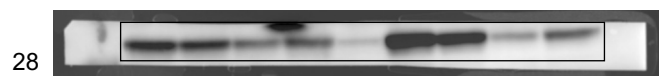

IB: UCP1

Extended Data Fig. 8i

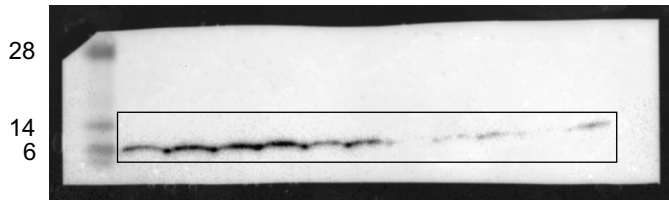

IB: S100B

51  
39

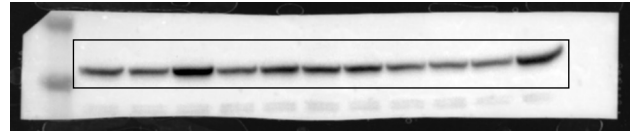

IB:  $\beta$ -Actin\*  
\*Same as Extended Data Fig. 8f

Extended Data Fig. 8j

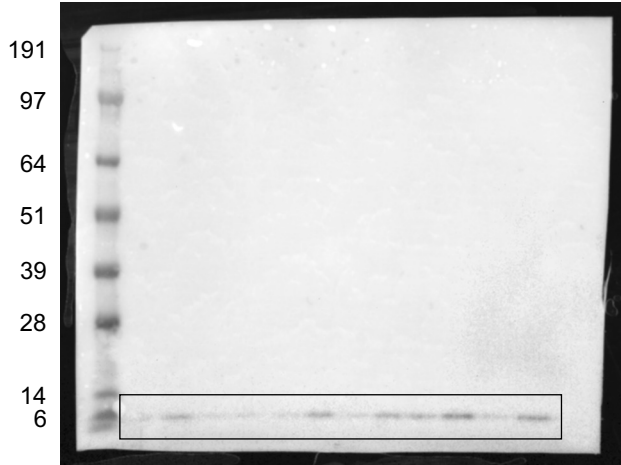

CM – IB: S100B

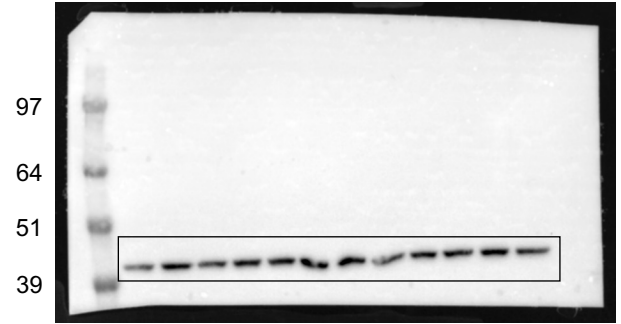

WCL – IB:  $\beta$ -Actin

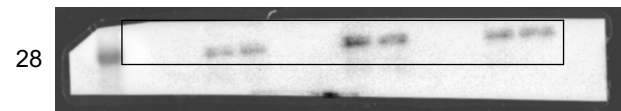

WCL – IB: CLSTN3

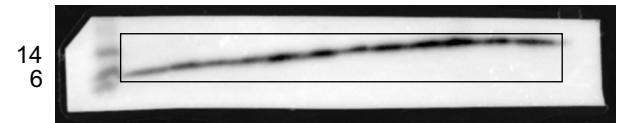

WCL – IB: S100B

Extended Data Fig. 9d

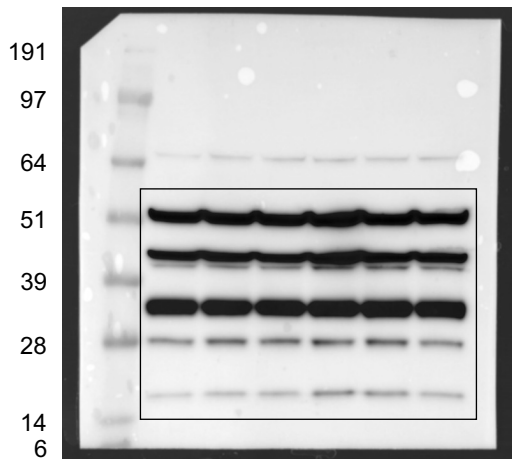

IB: OXPHOS

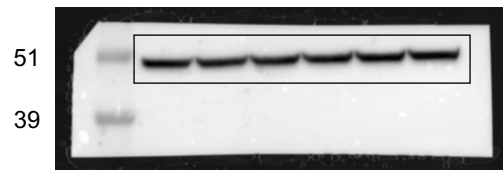

IB:  $\beta$ -Tubulin

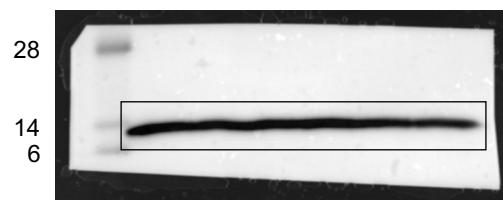

IB: FABP4

Extended Data Fig. 9f

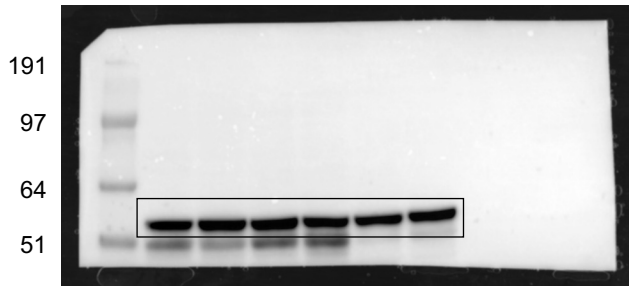

IB: TH

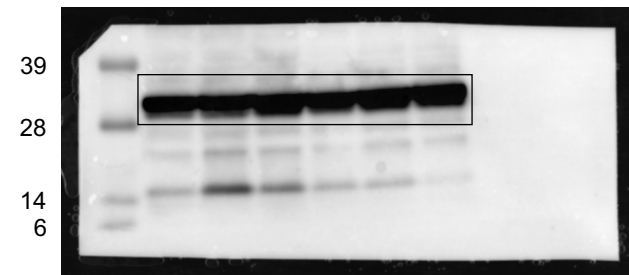

IB: UCP1

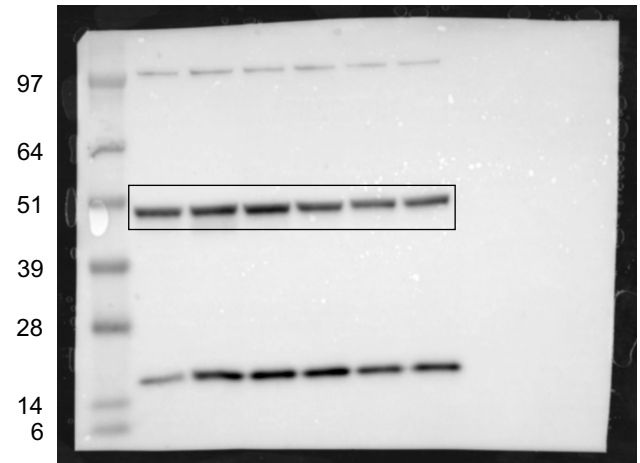

IB:  $\beta$ -Tubulin

Extended Data Fig. 11a

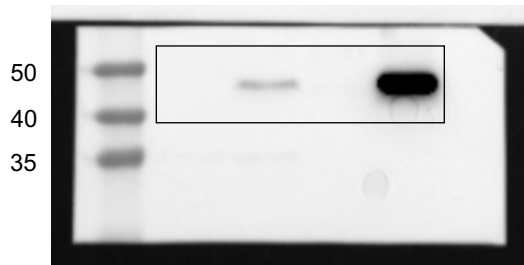

IB: Flag

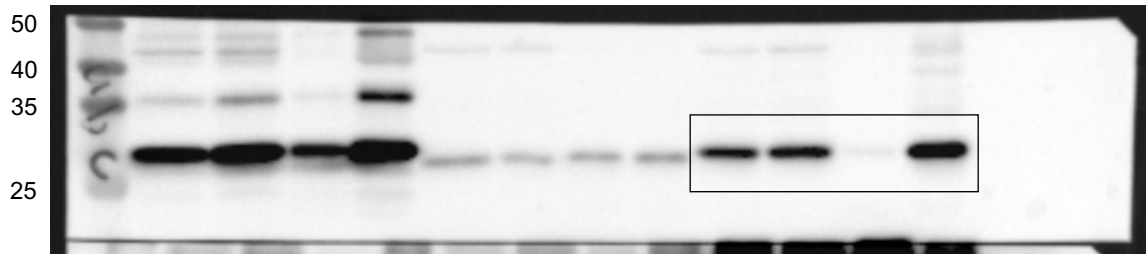

IB: HA

Extended Data Fig. 11b

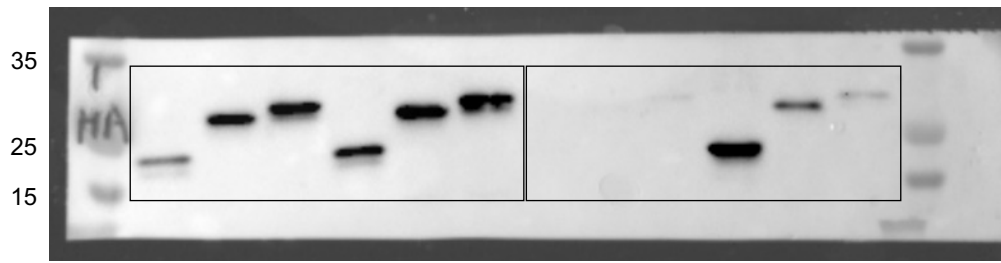

Input - IB: HA

IP - IB: HA

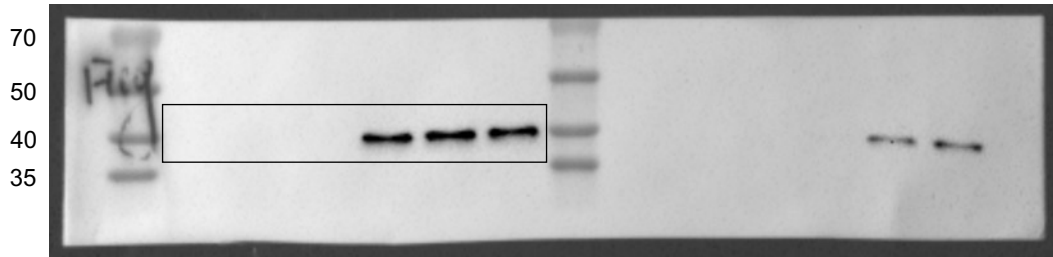

IP - IB: Flag

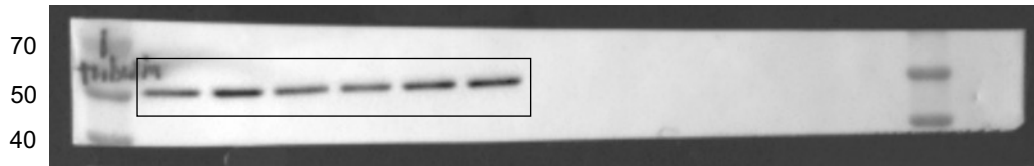

Input - IB: Tubulin

Extended Data Fig. 11c

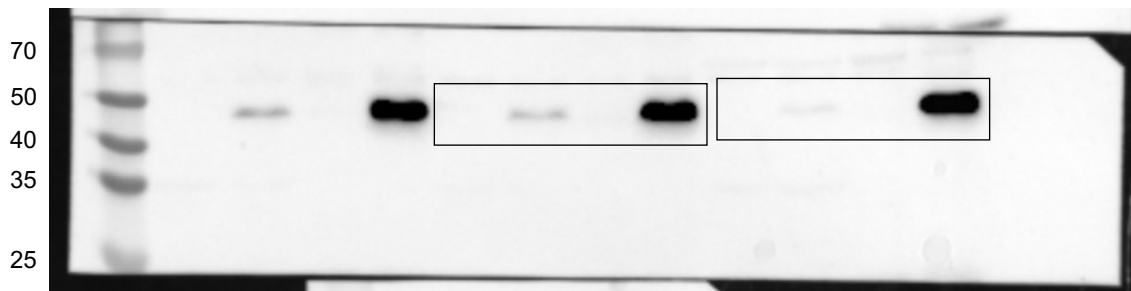

CGI58 - IB: Flag

RAB18 - IB: Flag

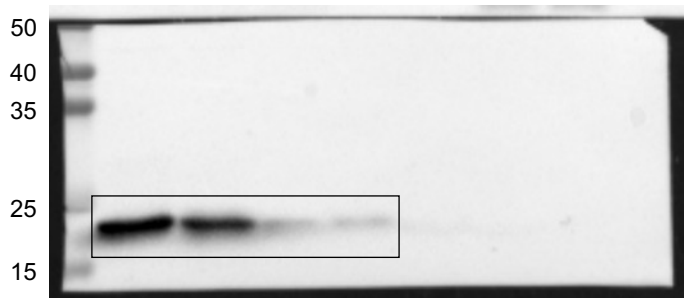

RAB18 - IB: HA

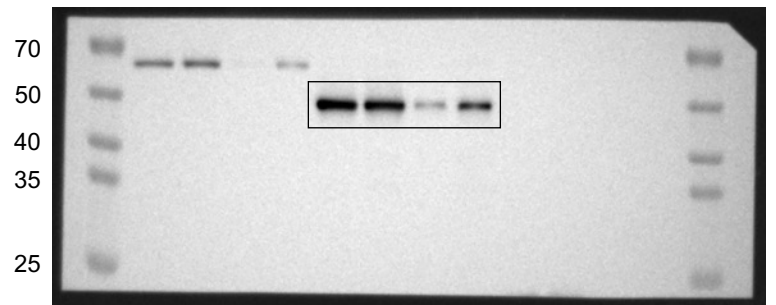

CGI58 - IB: HA

Extended Data Fig. 11d

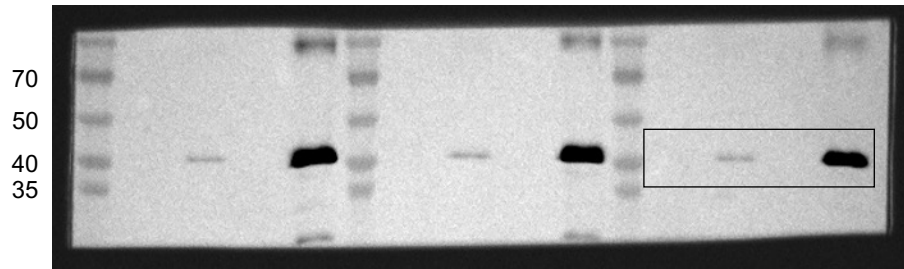

IB: Flag

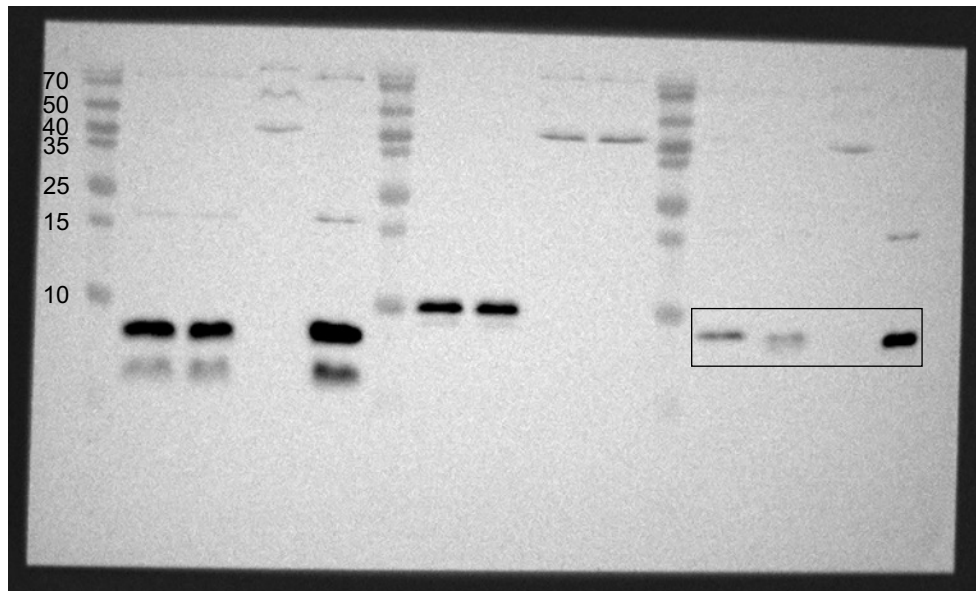

IB: HA

Extended Data Fig. 12c

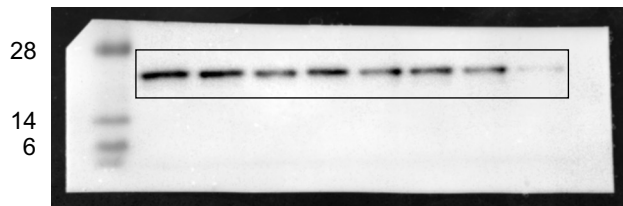

IB: CIDEA

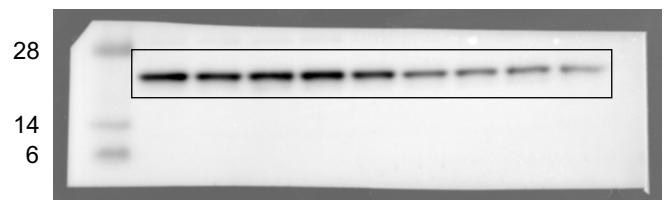

IB: CIDEA

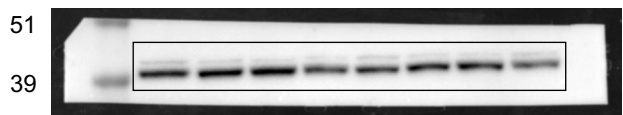

IB: CGI58

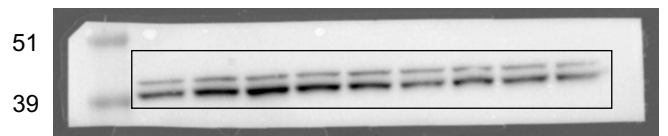

IB: CGI58

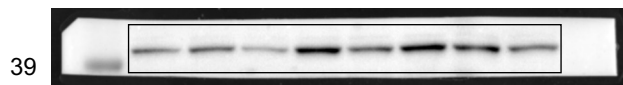

IB:  $\beta$ -Actin

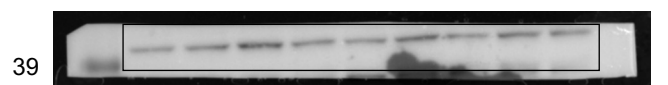

IB:  $\beta$ -Actin
