# Supplementary material
Source: PubMed Central journal article supplement (PMC9995219)
Supplement: NIHMS1875067-supplement-Suppl_Table_1.pdf [file NIHMS1875067-supplement-Suppl_Table_1.pdf]

**Supplementary Table 1: Primer and guide RNA sequences used in this study.**

| <b>qPCR primers</b>                  | <b>Forward</b>            | <b>Reverse</b>           | <b>Reference (PMID)</b> |
|--------------------------------------|---------------------------|--------------------------|-------------------------|
| <i>Clstn3</i> E1/2                   | AGGGGATAGGAACGCCTGG       | TGGCTTGTGCTTGTGGCTTTG    | This paper              |
| <i>Clstn3</i> E17/18                 | CGAAGGACCTGACCTCTTC       | TGGTAGGACTCCATAGGATTGAC  | This paper              |
| <i>Clstn3b</i>                       | AGAAGGGAGGTGTCACGGAA      | CAGAAAGCCCACGCATACCA     | This paper              |
| <i>Cidea</i>                         | TGCTCTTCTGTATCGCCAGT      | GCCGTGTTAAGGAATCTGCTG    | 17618855                |
| <i>Cox8b</i>                         | GAACCATGAAGCCAACGACT      | GCGAAGTTCACAGTGGTTCC     | 17618855                |
| <i>Dio2</i>                          | CAGTGTGGTGACGTCTCAAATC    | TGAACCAAAGTTGACCACCAG    | 17618855                |
| <i>Elov13</i>                        | TCCGCGTTCTCATGTAGGTCT     | GGACCTGATGCAACCCTATGA    | 17618855                |
| <i>Elov16</i>                        | TGCTGCATCCAGTTGAAGAC      | TGCCATGTTATCACCTTGT      | 17618855                |
| <i>Gfp</i>                           | AAGCTGACCCTGAAGTTCATCTG   | CTTGTAGTTGCCGTCGTCCTTGA  | This paper              |
| <i>Ppargc1a</i>                      | AGCCGTGACCACTGACAACGAG    | GCTGCATGGTTCTGAGTGCTAAG  | 17055439                |
| <i>Prdm16</i>                        | CAGCACGGTGAAGCCATTC       | GCGTGCATCCGCTTGTG        | 17618855                |
| <i>Ucp1</i>                          | ACTGCCACACCTCCAGTCATT     | CTTTGCCTCACTCAGGATTGG    | 17618855                |
| <i>CLSTN3</i> E1/2                   | TCCCAGGGGAGGCAAACG        | GCTTGTGCTTGTGGCTTTGTTA   | This paper              |
| <i>CLSTN3</i> E17/18                 | CCCATGGAAATGCTACCAAGAT    | GAGTCACTGCTGCCTCATCC     | This paper              |
| <i>CLSTN3B</i>                       | AGATGTTGGGGAAGCAGGAAC     | CACACCACAATGATGAGGGTT    | This paper              |
| <i>UCP1</i>                          | GCCCAATGAATACTGCCACT      | CTACGACACGGTCCAGGAGT     | 27575944                |
| <b>ChIP-qPCR primers</b>             |                           |                          |                         |
| <i>Clstn3</i> promoter               | TAGGTTTTTCTGGCCCTCCG      | AACCTGGAGGCAAAACCTCG     | This paper              |
| <i>Clstn3b</i> PPRE 1                | GGTGCACTCATTCTCCTCACTTT   | CTCCAGAGCCAACTCTGACAAAA  | This paper              |
| <i>Clstn3b</i> PPRE 2                | GTTGAGAAATGCTGATCCAACCA   | AAACAGATCTAACTCCGTAGGGG  | This paper              |
| <i>Fabp4</i> PPRE                    | GAGAGCAAATGGAGTTCCAGA     | TTGGGCTGTGACACTTCCAC     | 21459326                |
| <b>5' RLM-RACE primers</b>           |                           |                          |                         |
| <i>Clstn3</i> -specific outer primer | TGAGAGCAGAGTCATCCAGAA     |                          | This paper              |
| <i>Clstn3</i> -specific inner primer | CCGAGGATAACCATAAGCACCAGA  |                          | This paper              |
| <b>RT-PCR primers</b>                |                           |                          |                         |
| F1                                   | GTGTACCGAACAGGAGTGA       |                          | This paper              |
| F2                                   | TGAACCTGGGCATCAGAATGAG    |                          | This paper              |
| F3                                   | GGCAGTTGTGTGGTAECTAGA     |                          | This paper              |
| F4                                   | GTTTATGGCTGCTCGTTCTGTG    |                          | This paper              |
| F5                                   | GGTCTTCTCCTCATTGCTGT      |                          | This paper              |
| F6                                   | GGTGTGAAGGGCATCGAGAA      |                          | This paper              |
| F7                                   | CGGCAGGCATTCTCATTACC      |                          | This paper              |
| R                                    | CCGAGGATAACCATAAGCACCA    |                          | This paper              |
| <b>Genotyping primers</b>            |                           |                          |                         |
| <i>CLSTN3β</i> KO screening          | CCTGAACCTGGGCATCAGAA      | CCCAGAGGGAAAGAGAGGGT     | This paper              |
| <i>CLSTN3β</i> WT genotyping         | CCCAGACGAGGTGGGTAA        | CCCAGAGGGAAAGAGAGGGT     | This paper              |
| <i>CLSTN3β</i> KO genotyping         | CCAGATGACACACTTCAGTGG     | AGCCTACTGCTGCCTTGAAC     | This paper              |
| AdC3KO flox/flox genotyping          | TATTCACCTGTCCTTTGTCTCTAGG | CGTTCTAAATCACCTGCCCTTCA  | This paper              |
| Cre genotyping                       | GCGGTCTGGCAGTAAAACTATC    | GTGAAACAGCATTGCTGCACTT   | JAX                     |
| Cre internal control genotyping      | CTAGGCCACAGAATTGAAAGATCT  | GTAGGTGGAATTCTAGCATCATCC | JAX                     |
| <b>Guide RNAs</b>                    |                           |                          |                         |
| 5'                                   | GGCTTGGGACTGTATCTATG      |                          | This paper              |
| 3' ( <i>CLSTN3β</i> KO)              | CTTCACTTACCCACCTCGTC      |                          | This paper              |
| E17 KO                               | AGTGGATCCGAACGAGGCCG      |                          | This paper              |
